# Supplementary material for: A fast and simple LC-MS-based characterization of the flavonoid biosynthesis pathway for few seed(ling)s
Source: PubMed Central journal article supplement (PMC5007998; doi:10.1186/s12870-016-0880-7), 2016-09-01
Supplement: 12870_2016_880_MOESM1_ESM.pdf [file 12870_2016_880_MOESM1_ESM.pdf]

## Additional\_file\_1

**Table S1. List of external standards.**

| External standard | Purchased as          | Manufacturer          | Part-No        | Purity [%] |
|-------------------|-----------------------|-----------------------|----------------|------------|
| naringenin        | naringenin            | SAFC (Sigma-Aldrich)  | W530098-SAMPLE | 98         |
| taxifolin         | taxifolin             | Sigma                 | 78666-25MG-F   | 85         |
| kaempferol        | kaempferol            | Sigma                 | K0133-10MG     | 90         |
| quercetin         | quercetin             | Sigma                 | Q4951-10G      | 98         |
| isorhamnetin      | isorhamnetin          | Roth                  | 7589.1         | 99         |
| myricetin         | myricetin             | Sigma                 | 70050-25MG     | 96         |
| pelargonidin      | pelargonidin chloride | Aldrich               | P1659-5MG      | 100        |
| cyanidin          | cyanidin chloride     | Sigma                 | 79457-1MG-F    | 95         |
| delphinidin       | delphinidin chloride  | Sigma                 | 43725-1MG-F    | 95         |
| catechin          | (+)-catechin hydrate  | Sigma                 | C1251-5G       | 98         |
| epicatechin       | (-)-epicatechin       | Sigma                 | E1753-1G       | 90         |
| procyanidin B2    | procyanidin B2        | Fluka (Sigma-Aldrich) | 42157-1MG-F    | 90         |

**Table S2. Transition parameters.**

| Q1<br>[Da] | Q2<br>[Da] | dwel time<br>[ms] | name                                              | declustering<br>potential [V] | entrance<br>potential [V] | collision<br>energy [V] | exit<br>potential [V] |
|------------|------------|-------------------|---------------------------------------------------|-------------------------------|---------------------------|-------------------------|-----------------------|
| 273.1      | 153        | 10                | <u>naringenin 1</u>                               | 250                           | 10                        | 33                      | 14                    |
| 273.1      | 147        | 10                | naringenin 2                                      | 250                           | 10                        | 29                      | 14                    |
| 305.3      | 153        | 10                | <u>taxifoline 1</u>                               | 96                            | 10                        | 25                      | 14                    |
| 305.3      | 259.3      | 10                | taxifoline 2                                      | 91                            | 10                        | 17                      | 18                    |
| 287        | 153        | 10                | <u>kaempferol 1</u>                               | 120                           | 10                        | 45                      | 12                    |
| 287        | 121        | 10                | kaempferol 2                                      | 120                           | 10                        | 43                      | 8                     |
| 303        | 153        | 10                | <u>quercetin 1</u>                                | 250                           | 10                        | 43                      | 6                     |
| 303        | 137        | 10                | Quercetin 2                                       | 250                           | 10                        | 43                      | 12                    |
| 317        | 153        | 10                | <u>isorhamnetin 1</u>                             | 181                           | 10                        | 45                      | 18                    |
| 317        | 229        | 10                | isorhamnetin 2                                    | 191                           | 10                        | 43                      | 18                    |
| 319        | 153        | 10                | <u>myricetin 1</u>                                | 120                           | 10                        | 45                      | 10                    |
| 319        | 217        | 10                | myricetin 2                                       | 120                           | 10                        | 47                      | 14                    |
| 271        | 121        | 10                | <u>pelargonidin 1</u>                             | 120                           | 10                        | 57                      | 20                    |
| 271        | 141        | 10                | pelargonidin 2                                    | 120                           | 10                        | 49                      | 10                    |
| 286.95     | 136.95     | 10                | cyanidine 1                                       | 120                           | 10                        | 45                      | 10                    |
| 286.95     | 213        | 10                | <u>cyanidine 2</u>                                | 120                           | 10                        | 45                      | 14                    |
| 303        | 229        | 10                | <u>delphinidin 1</u>                              | 120                           | 10                        | 43                      | 14                    |
| 303        | 173        | 10                | delphinidin 2                                     | 120                           | 10                        | 47                      | 14                    |
| 291.1      | 138.9      | 10                | <u>(epi)catechin 1 (used<br/>for catechin)</u>    | 120                           | 10                        | 21                      | 12                    |
| 291.1      | 123        | 10                | <u>(epi)catechin 2 (used<br/>for epicatechin)</u> | 120                           | 10                        | 39                      | 8                     |
| 579        | 127.1      | 10                | <u>procyanidin B2 1</u>                           | 191                           | 10                        | 35                      | 14                    |
| 579        | 409.1      | 10                | procyanidin B2 2                                  | 181                           | 10                        | 27                      | 22                    |
| 306.1      | 232.1      | 10                | D3 quercetin 1                                    | 111                           | 10                        | 43                      | 12                    |
| 306.1      | 154        | 10                | <u>D3 quercetin 2</u>                             | 91                            | 10                        | 45                      | 14                    |
| 290.1      | 169.9      | 10                | <u>D3 sakuranetin 1</u>                           | 56                            | 10                        | 33                      | 14                    |
| 290.1      | 146.9      | 10                | D3 sakuranetin 2                                  | 51                            | 10                        | 29                      | 12                    |

Underlined: quantifier, not underlined: qualifier. For catechin/epicatechin the opposite than the one selected is the qualifier.
