# Supplementary material for: A fast and simple LC-MS-based characterization of the flavonoid biosynthesis pathway for few seed(ling)s
Source: PubMed Central journal article supplement (PMC5007998; doi:10.1186/s12870-016-0880-7), 2016-09-01
Supplement: 12870_2016_880_MOESM2_ESM.pdf [file 12870_2016_880_MOESM2_ESM.pdf]

# Additional\_file\_2

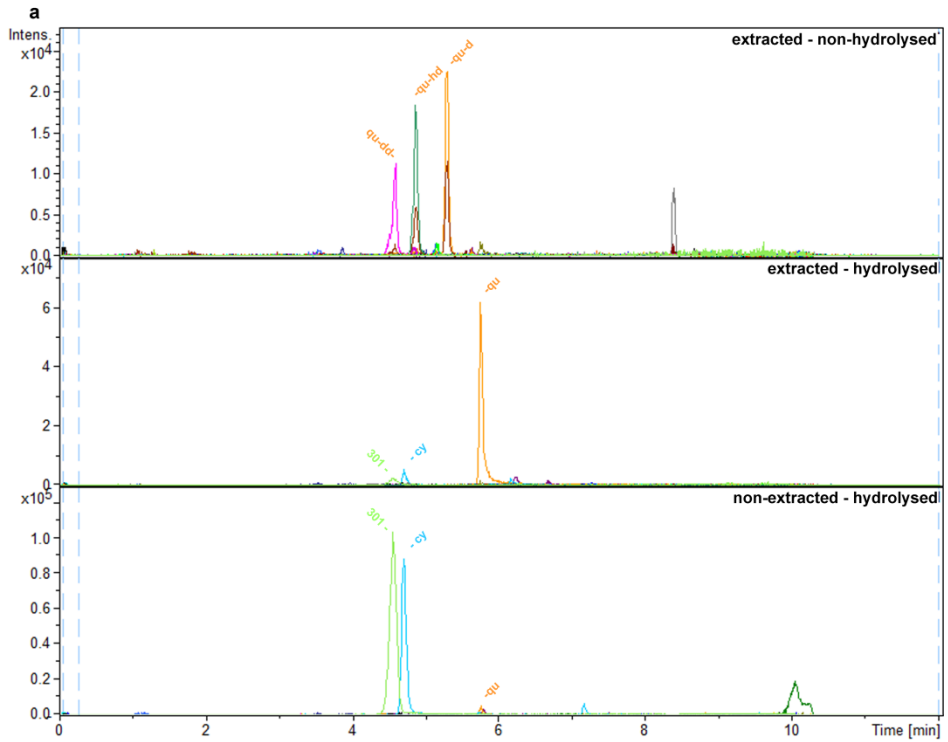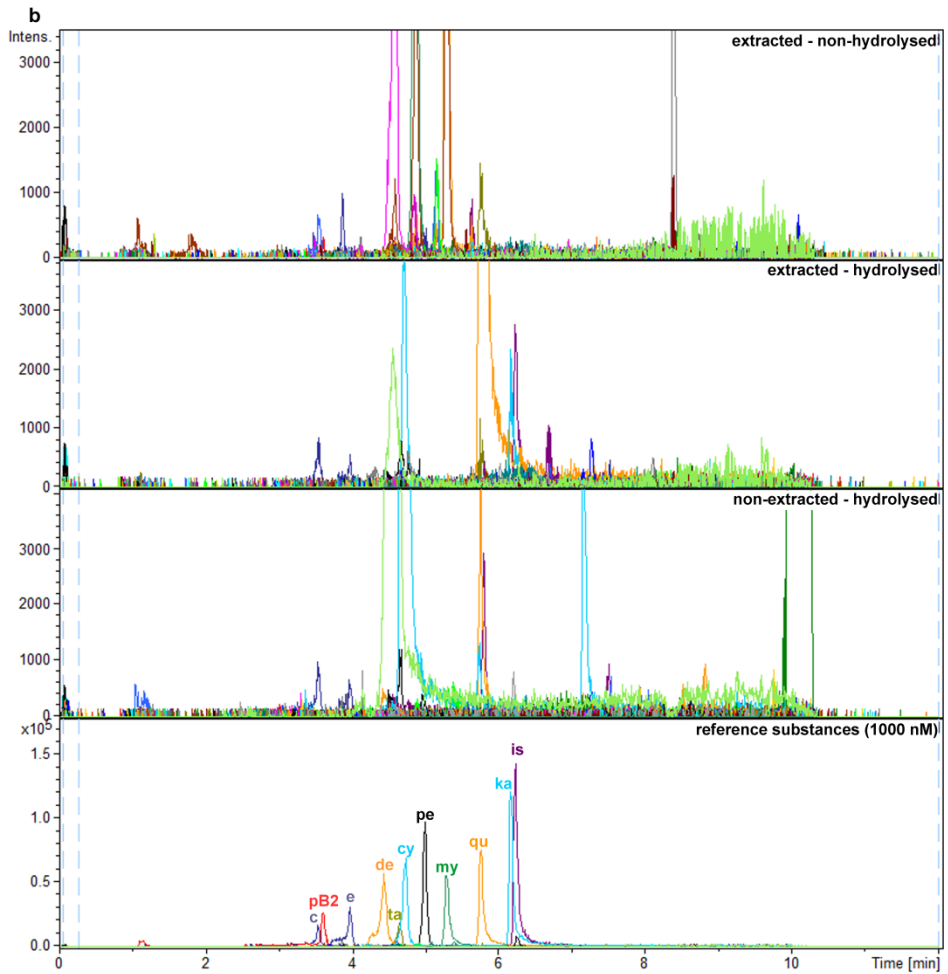

### **Figure S1: Reduced complexity of extracts after hydrolysis.**

**a,b** Hydrolysis reduces complexity of samples. Exemplary results from LC-ESI-MS-QTOF(AutoMSMS) of an extracted non-hydrolysed sample from ten *A. thaliana* seeds prior to hydrolysis, after hydrolysis and a non-extracted hydrolysed sample. All samples originate from the same ten seeds. Shown are all EICs for all  $m/z$  values documented in Table S3,S6 covering all glycosylated flavonoids analyzed in Fig. 1c and all substances shown in Fig. 1a. In b a zoom into the lower responses is shown. Note the dominant response of quercetin-based glycosides in extracted non-hydrolysed samples and of quercetin in extracted hydrolysed samples as well as of cyanidin in non-extracted hydrolysed samples. The comparably high green peak in the latter sample corresponds to the  $m/z$  value of peonidin which is a methylated derivate of cyanidin. Quercetin-based glycosides were identified as described for Fig. 1c, Table S4,5. Cyanidin and quercetin were identified using the selected external standards.

ta: taxifolin, ka: kaempferol, qu: quercetin, is: isorhamnetin, my: myricetin, pe: pelargonidin, cy: cyanidin, de: delphinidin, c: catechin, e: epicatechin, pB: procyanidinB2.

**Table S3. Calculated  $m/z$  values for detection of glycosylated flavonoids.**

| core component:<br>sugar(s)<br>added: | naringenin | taxifolin | kaempferol | quercetin | isorhamnetin | myricetin | pelargonidin | cyanidin | delphinidin | catechin/epicatechin | procyanidin |
|---------------------------------------|------------|-----------|------------|-----------|--------------|-----------|--------------|----------|-------------|----------------------|-------------|
| p                                     | 405.7997   | 437.1079  | 419.0973   | 435.0922  | 449.1079     | 451.0871  | 403.1024     | 419.0973 | 435.0922    | 423.1286             | 711.1920    |
| d                                     | 419.8153   | 451.1235  | 433.1129   | 449.1078  | 463.1235     | 465.1027  | 417.1180     | 433.1129 | 449.1078    | 437.1442             | 725.2076    |
| h                                     | 435.8102   | 467.1184  | 449.1078   | 465.1027  | 479.1184     | 481.0976  | 433.1129     | 449.1078 | 465.1027    | 453.1391             | 741.2025    |
| pp                                    | 537.8420   | 569.1502  | 551.1396   | 567.1345  | 581.1502     | 583.1294  | 535.1447     | 551.1396 | 567.1345    | 555.1709             | 843.2343    |
| dp                                    | 551.8576   | 583.1658  | 565.1552   | 581.1501  | 595.1658     | 597.1450  | 549.1603     | 565.1552 | 581.1501    | 569.1865             | 857.2499    |
| dd                                    | 565.8732   | 597.1814  | 579.1708   | 595.1657  | 609.1814     | 611.1606  | 563.1759     | 579.1708 | 595.1657    | 583.2021             | 871.2655    |
| hp                                    | 567.8525   | 599.1607  | 581.1501   | 597.1450  | 611.1607     | 613.1399  | 565.1552     | 581.1501 | 597.1450    | 585.1814             | 873.2448    |
| hd                                    | 581.8681   | 613.1763  | 595.1657   | 611.1606  | 625.1763     | 627.1555  | 579.1708     | 595.1657 | 611.1606    | 599.1970             | 887.2604    |
| hh                                    | 597.8630   | 629.1712  | 611.1606   | 627.1555  | 641.1712     | 643.1504  | 595.1657     | 611.1606 | 627.1555    | 615.1919             | 903.2553    |
| ppp                                   | 669.8843   | 701.1925  | 683.1819   | 699.1768  | 713.1925     | 715.1717  | 667.1870     | 683.1819 | 699.1768    | 687.2132             | 975.2766    |
| dpp                                   | 683.8999   | 715.2081  | 697.1975   | 713.1924  | 727.2081     | 729.1873  | 681.2026     | 697.1975 | 713.1924    | 701.2288             | 989.2922    |
| ddp                                   | 697.9155   | 729.2237  | 711.2131   | 727.2080  | 741.2237     | 743.2029  | 695.2182     | 711.2131 | 727.2080    | 715.2444             | 1003.3078   |
| hpp                                   | 699.8948   | 731.2030  | 713.1924   | 729.1873  | 743.2030     | 745.1822  | 697.1975     | 713.1924 | 729.1873    | 717.2237             | 1005.2871   |
| ddd                                   | 711.9311   | 743.2393  | 725.2287   | 741.2236  | 755.2393     | 757.2185  | 709.2338     | 725.2287 | 741.2236    | 729.2600             | 1017.3234   |
| hdp                                   | 713.9104   | 745.2186  | 727.2080   | 743.2029  | 757.2186     | 759.1978  | 711.2131     | 727.2080 | 743.2029    | 731.2393             | 1019.3027   |
| hdd                                   | 727.9260   | 759.2342  | 741.2236   | 757.2185  | 771.2342     | 773.2134  | 725.2287     | 741.2236 | 757.2185    | 745.2549             | 1033.3183   |
| hhp                                   | 729.9053   | 761.2135  | 743.2029   | 759.1978  | 773.2135     | 775.1927  | 727.2080     | 743.2029 | 759.1978    | 747.2342             | 1035.2976   |
| hhd                                   | 743.9209   | 775.2291  | 757.2185   | 773.2134  | 787.2291     | 789.2083  | 741.2236     | 757.2185 | 773.2134    | 761.2498             | 1049.3132   |
| hhh                                   | 759.9158   | 791.2240  | 773.2134   | 789.2083  | 803.2240     | 805.2032  | 757.2185     | 773.2134 | 789.2083    | 777.2447             | 1065.3081   |
| pppp                                  | 801.9266   | 833.2348  | 815.2242   | 831.2191  | 845.2348     | 847.2140  | 799.2293     | 815.2242 | 831.2191    | 819.2555             | 1107.3189   |
| dppp                                  | 815.9422   | 847.2504  | 829.2398   | 845.2347  | 859.2504     | 861.2296  | 813.2449     | 829.2398 | 845.2347    | 833.2711             | 1121.3345   |
| ddpp                                  | 829.9578   | 861.2660  | 843.2554   | 859.2503  | 873.2660     | 875.2452  | 827.2605     | 843.2554 | 859.2503    | 847.2867             | 1135.3501   |
| hppp                                  | 831.9371   | 863.2453  | 845.2347   | 861.2296  | 875.2453     | 877.2245  | 829.2398     | 845.2347 | 861.2296    | 849.2660             | 1137.3294   |
| dddp                                  | 843.9734   | 875.2816  | 857.2710   | 873.2659  | 887.2816     | 889.2608  | 841.2761     | 857.2710 | 873.2659    | 861.3023             | 1149.3657   |
| hdpp                                  | 845.9527   | 877.2609  | 859.2503   | 875.2452  | 889.2609     | 891.2401  | 843.2554     | 859.2503 | 875.2452    | 863.2816             | 1151.3450   |
| dddd                                  | 857.9890   | 889.2972  | 871.2866   | 887.2815  | 901.2972     | 903.2764  | 855.2917     | 871.2866 | 887.2815    | 875.3179             | 1163.3813   |
| hddp                                  | 859.9683   | 891.2765  | 873.2659   | 889.2608  | 903.2765     | 905.2557  | 857.2710     | 873.2659 | 889.2608    | 877.2972             | 1165.3606   |
| hhpp                                  | 861.9476   | 893.2558  | 875.2452   | 891.2401  | 905.2558     | 907.2350  | 859.2503     | 875.2452 | 891.2401    | 879.2765             | 1167.3399   |
| hddd                                  | 873.9839   | 905.2921  | 887.2815   | 903.2764  | 917.2921     | 919.2713  | 871.2866     | 887.2815 | 903.2764    | 891.3128             | 1179.3762   |
| hhdp                                  | 875.9632   | 907.2714  | 889.2608   | 905.2557  | 919.2714     | 921.2506  | 873.2659     | 889.2608 | 905.2557    | 893.2921             | 1181.3555   |
| hhdd                                  | 889.9788   | 921.2870  | 903.2764   | 919.2713  | 933.2870     | 935.2662  | 887.2815     | 903.2764 | 919.2713    | 907.3077             | 1195.3711   |
| hhhp                                  | 891.9581   | 923.2663  | 905.2557   | 921.2506  | 935.2663     | 937.2455  | 889.2608     | 905.2557 | 921.2506    | 909.2870             | 1197.3504   |
| hhhd                                  | 905.9737   | 937.2819  | 919.2713   | 935.2662  | 949.2819     | 951.2611  | 903.2764     | 919.2713 | 935.2662    | 923.3026             | 1211.3660   |
| hhhh                                  | 921.9686   | 953.2768  | 935.2662   | 951.2611  | 965.2768     | 967.2560  | 919.2713     | 935.2662 | 951.2611    | 939.2975             | 1227.3609   |
| <b>m/z for aglycon</b>                | 273.7574   | 305.0656  | 287.0550   | 303.0499  | 317.0656     | 319.0448  | 271.0601     | 287.0550 | 303.0499    | 291.0863             | 579.14968   |

$m/z$  values  $[M+H]^+$  calculated for the set of selected substances glycosylated with different combinations of pentoses, deoxyhexoses and hexoses. p=pentose, d=deoxyhexose, h= hexose

**Table S4. Glycosylated flavonoids in extracted non-hydrolysed samples from *A. thaliana* seeds**

| Rt [min]    | AutoMSMS            |                                 | ISCID                                     | Aglycon [m/z] | Predicted/identified glycoside<br>- level of prediction/identification - |            |                    |                              |                        | Possible larger glycoside<br>- level of prediction/identification - |                                |                              |                            |            | Overlapping<br>EIC peaks<br>(same m/z) |
|-------------|---------------------|---------------------------------|-------------------------------------------|---------------|--------------------------------------------------------------------------|------------|--------------------|------------------------------|------------------------|---------------------------------------------------------------------|--------------------------------|------------------------------|----------------------------|------------|----------------------------------------|
|             | ESI-MS<br>[m/z] max | Fragment<br>[m/z]               | Fragment<br>[m/z]                         |               | Aglycon                                                                  | Sugar      | Max m/z            | Highest<br>accuracy<br>[m/z] | (Predicted)<br>aglycon | Sugar<br>modifi-<br>cation                                          | Max m/z<br>(lower<br>accuracy) | (Predict-<br>ted)<br>aglycon | Sugar<br>modifi-<br>cation | Max<br>m/z |                                        |
| <b>3.4</b>  | 453.1391            | <u>453.1391</u>                 |                                           | 291.0879      | predicted                                                                | calculated | co-o               | 453.1391                     | (c/e)                  | h                                                                   |                                |                              |                            |            | +                                      |
|             |                     | 291.0879                        | 291.0879                                  |               |                                                                          |            |                    |                              |                        |                                                                     |                                |                              |                            |            |                                        |
| <b>3.63</b> | 599.197             | 599.197                         |                                           | 291.0879      | predicted                                                                | calculated | co-o               | 599.197                      | (c/e)                  | hd                                                                  |                                |                              |                            |            | +                                      |
|             |                     | <u>453.1391</u>                 |                                           |               |                                                                          |            |                    |                              |                        |                                                                     |                                |                              |                            |            |                                        |
|             |                     | <u>437.1442</u>                 | 437.1442                                  |               |                                                                          |            |                    |                              |                        |                                                                     |                                |                              |                            |            |                                        |
| <b>4.17</b> | 757.2185            | <u>757.2185</u>                 |                                           | 303.0499      | predicted                                                                | calculated | co-o, sigma<br><50 | 757.2185                     | (qu/de)                | hdd                                                                 |                                |                              |                            |            | +                                      |
|             |                     | 611.1606                        | 611.1606                                  |               |                                                                          |            |                    |                              |                        |                                                                     |                                |                              |                            |            |                                        |
|             |                     | 449.1078                        | 449.1078                                  |               |                                                                          |            |                    |                              |                        |                                                                     |                                |                              |                            |            |                                        |
|             |                     |                                 | 303.0499                                  |               |                                                                          |            |                    |                              |                        |                                                                     |                                |                              |                            |            |                                        |
| <b>4.19</b> | 611.1606            | <u>611.1606</u>                 |                                           | 303.0499      | predicted                                                                | calculated | co-o               | 611.1606                     | (qu/de)                | hd                                                                  |                                |                              |                            |            | +                                      |
|             |                     | 465.1025                        | 611.1606                                  |               |                                                                          |            |                    |                              |                        |                                                                     |                                |                              |                            |            |                                        |
|             |                     | 449.1078                        | 449.1078                                  |               |                                                                          |            |                    |                              |                        |                                                                     |                                |                              |                            |            |                                        |
|             |                     |                                 | 303.0499                                  |               |                                                                          |            |                    |                              |                        |                                                                     |                                |                              |                            |            |                                        |
| <b>4.67</b> | 773.2134            | 773.2134                        |                                           | 303.0499      | predicted                                                                | calculated | sfs                | 611.1606                     | (qu/de)                | hd                                                                  | 773.2134                       | (qu/de)                      | hhd                        | co-o       | +                                      |
|             |                     | <u>611.1606</u>                 | 611.1606                                  |               |                                                                          |            |                    |                              |                        |                                                                     |                                |                              |                            |            |                                        |
|             |                     | 449.1022                        | 449.1022                                  |               |                                                                          |            |                    |                              |                        |                                                                     |                                |                              |                            |            |                                        |
|             |                     | 303.0499                        | 303.0499                                  |               |                                                                          |            |                    |                              |                        |                                                                     |                                |                              |                            |            |                                        |
| <b>4.71</b> | 611.1606            | <u>611.1606</u>                 |                                           | 303.0499      | identified                                                               | MSMS       | MSMS               | 611.1606                     | qu                     | hd                                                                  |                                |                              |                            |            | +                                      |
|             |                     | (54.4 eV:<br>303.0502<br>(100)) | (54.4 eV:<br>303.0501<br>(100))           |               |                                                                          |            |                    |                              |                        |                                                                     |                                |                              |                            |            |                                        |
|             |                     |                                 | 465.1025                                  |               |                                                                          |            |                    |                              |                        |                                                                     |                                |                              |                            |            |                                        |
|             |                     |                                 | 449.1022                                  |               |                                                                          |            |                    |                              |                        |                                                                     |                                |                              |                            |            |                                        |
|             |                     |                                 | (48.1 eV:<br>303.0499<br>(100))           |               |                                                                          |            |                    |                              |                        |                                                                     |                                |                              |                            |            |                                        |
|             |                     |                                 | 303.0499                                  |               |                                                                          |            |                    |                              |                        |                                                                     |                                |                              |                            |            |                                        |
|             |                     |                                 | (42.6 eV<br>303.0497<br>(75),<br>229.0497 |               |                                                                          |            |                    |                              |                        |                                                                     |                                |                              |                            |            |                                        |
|             |                     |                                 |                                           |               |                                                                          |            |                    |                              |                        |                                                                     |                                |                              |                            |            |                                        |



**Table S4. Glycosylated flavonoids in extracted non-hydrolysed samples from *A. thaliana* seeds**

|             |          |                                                    |                                                                                           |          |           |            |                    |          |         |   |   |
|-------------|----------|----------------------------------------------------|-------------------------------------------------------------------------------------------|----------|-----------|------------|--------------------|----------|---------|---|---|
|             |          | (48.1 eV:<br>303.0502<br>(100))<br><u>303.0499</u> | 303.0499                                                                                  |          |           |            |                    |          |         |   |   |
|             |          |                                                    | (42.6 eV:<br>303.0512<br>(78), 229.05<br>(100),<br>201.0551<br>(69),<br>153.0191<br>(36)) |          |           |            |                    |          |         |   |   |
| <b>5.76</b> | 433.1126 | 433.1126                                           | <u>287.0550</u>                                                                           | 287.0550 | predicted | calculated | co-o               | 433.1126 | (ka/cy) | d | - |
|             |          |                                                    | 287.0550                                                                                  |          |           |            |                    |          |         |   |   |
| <b>5.77</b> | 463.1235 | 463.1235                                           | 463.1235                                                                                  | 317.0656 | predicted | calculated | co-o, sigma<br><10 | 463.1235 | (is)    | d | - |
|             |          | <u>317.0656</u>                                    | 317.0656                                                                                  |          |           |            |                    |          |         |   |   |

5 seeds were analysed. *m/z* values: [M+H]<sup>+</sup>. Fragments were detected by analysing the given calculated EICs. For further fragmentations, the detected exact masses and collision energy are given in brackets. Brackets behind subfragments indicate percentages of fragment intensities. Aglycons were either predicted by the detected *m/z* or identified by MSMS. Predicted aglycons are written in brackets. These could as well be other substances of the same *m/z*. Measurements were done with LC-ESI-MS-QTOF(AutoMSMS) or LC-ESI-MS-QTOF(pseudoMS<sup>3</sup>) (here labelled with ISCID) method.

**Underlined:** the fragment with the strongest response in the AutoMSMS experiment; **identified:** either MSMS or smart formula highest accuracy; **predicted:** all other mentioned methods.

Attached sugars were defined as follows. **calculated:** co-occurring masses at the same retention time differ by the size of a neutral loss (hexose or deoxy-hexose), **MSMS:** an MSMS has been recorded and a neutral loss of the size of a hexose or deoxy-hexose was observed.

The maximal given *m/z* was detected as follows. **co-o:** co-occurrence: peaks from calculated EICs of the listed size co-occur at the same retention time and peak shapes are similar; **sfe:** In addition, for the fragment of maximal size, smartformula function of the Compass DataAnalysis software gives an error of less than 1ppm; **sigma:** smart formula function of Compass DataAnalysis software gives additionally a sigma value as indicated; **MSMS:** an MSMS of the fragment of maximal mass was recorded and releases a mass corresponding to that of the aglycon.

ISCID: in source collision-induced dissociation, h: hexose, d: deoxy-hexose ta: taxifolin, cy: cyanidin, ka: kaempferol, qu: quercetin, is: isorhamnetin, e/c: epicatechin or catechin, de: delphinidin.

**Table S5. Glycosylated flavonoids in soluble, non-hydrolysed samples from *A. thaliana* seedlings**

| Rt [min] | AutoMSMS            |                   | ISCID             | Aglycon [m/z] | Predicted/identified glycoside<br>- level of prediction/identification - |            |         |                              |                        | Possible larger glycoside<br>- level of prediction/identification - |                                |                              |                            |            | Overlapping<br>EIC peaks<br>(same m/z) |
|----------|---------------------|-------------------|-------------------|---------------|--------------------------------------------------------------------------|------------|---------|------------------------------|------------------------|---------------------------------------------------------------------|--------------------------------|------------------------------|----------------------------|------------|----------------------------------------|
|          | ESI-MS<br>[m/z] max | Fragment<br>[m/z] | Fragment<br>[m/z] |               | Aglycon                                                                  | Sugar      | Max m/z | Highest<br>accuracy<br>[m/z] | (Predicted)<br>aglycon | Sugar<br>modifi-<br>cation                                          | Max m/z<br>(lower<br>accuracy) | (Predict-<br>ted)<br>aglycon | Sugar<br>modifi-<br>cation | Max<br>m/z |                                        |
| 3.55     | 467.1184            | <u>467.1184</u>   |                   | 305.0656      | predicted                                                                | calculated | co-o    | 467.1184                     | (ta)                   | h                                                                   | -                              |                              |                            | -          |                                        |
|          |                     | <u>305.0656</u>   | 305.0656          |               |                                                                          |            |         |                              |                        |                                                                     |                                |                              |                            |            |                                        |
| 3.64     | 599.197             | 599.197           |                   | 291.0863      | predicted                                                                | calculated | co-o    | 599.197                      | (c/e)                  | hd                                                                  |                                |                              |                            | -          |                                        |
|          |                     | <u>453.1391</u>   |                   |               |                                                                          |            |         |                              |                        |                                                                     |                                |                              |                            |            |                                        |
|          |                     | <u>437.1442</u>   | 437.1442          |               |                                                                          |            |         |                              |                        |                                                                     |                                |                              |                            |            |                                        |
|          |                     | <u>291.0863</u>   | 291.0863          |               |                                                                          |            |         |                              |                        |                                                                     |                                |                              |                            |            |                                        |
| 3.93     | 627.1556            | <u>627.1556</u>   | 627.1556          | 303.0499      | predicted                                                                | calculated | sfe     | 627.1556                     | (qu/de)                | hh                                                                  | -                              |                              |                            | -          |                                        |
|          |                     |                   | 465.1027          |               |                                                                          |            |         |                              |                        |                                                                     |                                |                              |                            |            |                                        |
|          |                     |                   | 303.0499          |               |                                                                          |            |         |                              |                        |                                                                     |                                |                              |                            |            |                                        |
| 3.98     | 757.2185            | <u>757.2185</u>   | 757.2185          | 303.0499      | predicted                                                                | calculated | co-o    | 757.2185                     | (qu/de)                | hdd                                                                 | -                              |                              |                            | +          |                                        |
|          |                     |                   | 611.1606          |               |                                                                          |            |         |                              |                        |                                                                     |                                |                              |                            |            |                                        |
|          |                     |                   | 595.1657          |               |                                                                          |            |         |                              |                        |                                                                     |                                |                              |                            |            |                                        |
|          |                     |                   | 449.1078          |               |                                                                          |            |         |                              |                        |                                                                     |                                |                              |                            |            |                                        |
|          |                     |                   | 303.0499          |               |                                                                          |            |         |                              |                        |                                                                     |                                |                              |                            |            |                                        |
| 4.14     | 741.2236            | <u>741.2236</u>   | 741.2236          | 287.055       | predicted                                                                | MSMS       | sfe     | 741.2236                     | (ka/cy)                | hdd                                                                 |                                |                              |                            | +          |                                        |
|          |                     |                   | 595.1657          |               |                                                                          |            |         |                              |                        |                                                                     |                                |                              |                            |            |                                        |
|          |                     |                   | 433.1129          |               |                                                                          |            |         |                              |                        |                                                                     |                                |                              |                            |            |                                        |









**Table S5. Glycosylated flavonoids in soluble, non-hydrolysed samples from *A. thaliana* seedlings**

|      |          | (100))                           |                                                                            |          |            |            |      |          |         |    |          |    |     |     |   |
|------|----------|----------------------------------|----------------------------------------------------------------------------|----------|------------|------------|------|----------|---------|----|----------|----|-----|-----|---|
|      |          | 303.0499                         | 303.0499                                                                   |          |            |            |      |          |         |    |          |    |     |     |   |
| 5.11 | 611.1606 | <u>611.1606</u>                  | 611.1606                                                                   | 303.0499 | predicted  | calculated | co-o | 611.1606 | (qu/de) | hd | -        |    |     |     | + |
|      |          | 465.1025                         | 465.1025                                                                   |          |            |            |      |          |         |    |          |    |     |     |   |
|      |          |                                  | 449.1022                                                                   |          |            |            |      |          |         |    |          |    |     |     |   |
|      |          | 303.0499                         | 303.0499                                                                   |          |            |            |      |          |         |    |          |    |     |     |   |
| 5.17 | 465.1025 | <u>465.1025</u>                  | 465.1025                                                                   | 303.0499 | predicted  | calculated | co-o | 465.1025 | (qu/de) | h  | -        |    |     |     | + |
|      |          | 303.0499                         | 303.0499                                                                   |          |            |            |      |          |         |    |          |    |     |     |   |
| 5.28 | 579.1711 | <u>725.2287</u>                  | 725.2287                                                                   | 287.055  | identified | MSMS       | MSMS | 579.1711 | ka      | dd | 725.2287 | ka | ddd | sfe | - |
|      |          | <u>579.1711</u>                  | 579.1711                                                                   |          |            |            |      |          |         |    |          |    |     |     |   |
|      |          | (53.18 eV:<br>287.055<br>(100))  | (53.17 eV:<br>287.0554<br>(100))                                           |          |            |            |      |          |         |    |          |    |     |     |   |
|      |          | 433.1129                         | 433.1129                                                                   |          |            |            |      |          |         |    |          |    |     |     |   |
|      |          | (47.49 eV:<br>287.0553<br>(100)) | (47.5eV:<br>287.0548<br>(100))                                             |          |            |            |      |          |         |    |          |    |     |     |   |
|      |          | 287.0554                         | 287.0554                                                                   |          |            |            |      |          |         |    |          |    |     |     |   |
|      |          |                                  | (42.02 eV:<br>287.0554<br>(100),<br>213.0549<br>(30),<br>153.0188<br>(41)) |          |            |            |      |          |         |    |          |    |     |     |   |
| 5.31 | 609.1814 | <u>609.1814</u>                  | 609.1814                                                                   | 317.0656 | predicted  | calculated | co-o | 609.1814 | (is)    | dd |          |    |     |     | - |
|      |          | 463.1235                         | 463.1235                                                                   |          |            |            |      |          |         |    |          |    |     |     |   |
|      |          |                                  | 317.0656                                                                   |          |            |            |      |          |         |    |          |    |     |     |   |



**Table S5. Glycosylated flavonoids in soluble, non-hydrolysed samples from *A. thaliana* seedlings**

|      |          |                 |          |          |           |            |      |          |         |     |   |   |
|------|----------|-----------------|----------|----------|-----------|------------|------|----------|---------|-----|---|---|
| 3.93 | 627.1556 | <u>627.1556</u> | 627.1556 | 303.0499 | predicted | calculated | sfe  | 627.1556 | (qu/de) | hh  | - | - |
|      |          |                 | 465.1027 |          |           |            |      |          |         |     |   |   |
|      |          |                 |          | 303.0499 |           |            |      |          |         |     |   |   |
| 3.98 | 757.2185 | <u>757.2185</u> | 757.2185 | 303.0499 | predicted | calculated | co-o | 757.2185 | (qu/de) | hdd | - | + |
|      |          |                 | 611.1606 |          |           |            |      |          |         |     |   |   |
|      |          |                 |          |          |           |            |      |          |         |     |   |   |
|      |          |                 | 595.1657 |          |           |            |      |          |         |     |   |   |
|      |          |                 |          |          |           |            |      |          |         |     |   |   |
|      |          |                 | 449.1078 |          |           |            |      |          |         |     |   |   |
|      |          |                 |          |          |           |            |      |          |         |     |   |   |
|      |          |                 |          | 303.0499 |           |            |      |          |         |     |   |   |

10 and 20 seedlings were analysed.  $m/z$  values:  $[M+H]^+$ . Fragments were detected by analysing the given calculated EICs. For further fragmentations, the detected exact masses and collision energy are given in brackets. Brackets behind subfragments indicate percentages of fragment intensities. Aglycons were either predicted by the detected  $m/z$  or identified by MSMS. Predicted aglycons are written in brackets. These could as well be other substances of the same  $m/z$ . Measurements were done with LC-ESI-MS-QTOF(AutoMSMS) or LC-ESI-MS-QTOF(pseudoMS<sup>3</sup>) (here labelled with ISCID) method.

**Underlined:** the fragment with the strongest response in the AutoMSMS experiment; **identified:** either MSMS or smart formula highest accuracy; **predicted:** all other mentioned methods.

Attached sugars were defined as follows. **calculated:** co-occurring masses at the same retention time differ by the size of a neutral loss (hexose or deoxy-hexose), **MSMS:** an MSMS has been recorded and a neutral loss of the size of a hexose or deoxy-hexose was observed.

The maximal given  $m/z$  was detected as follows. **co-o:** co-occurrence: peaks from calculated EICs of the listed size co-occur at the same retention time and peak shapes are similar; **sfe:** In addition, for the fragment of maximal size, smartformula function of the Compass DataAnalysis software gives an error of less than 1ppm; **sigma:** smart formula function of Compass DataAnalysis software gives additionally a sigma value as indicated; **MSMS:** an MSMS of the fragment of maximal mass was recorded and releases a mass corresponding to that of the aglycon.

ISCID: in source collision-induced dissociation, h: hexose, d: deoxy-hexose ta: taxifolin, cy: cyanidin, ka: kaempferol, qu: quercetin, is: isorhamnetin, e/c: epicatechin or catechin, de: delphinidin.

**Table S6. Calculated *m/z* values for selected substances.**

| <b><i>m/z</i><br/>[M+H]<sup>+</sup></b> | <b>name of substance</b>                | <b>comment</b>                     |
|-----------------------------------------|-----------------------------------------|------------------------------------|
| 271.0601                                | pelargonidin                            | external standard                  |
| 273.7574                                | naringenin                              | external standard                  |
| 287.0550                                | kaempferol                              | external standard                  |
| 287.0550                                | cyandin                                 | external standard                  |
| 291.0863                                | catechin/epicatechin                    | external standard                  |
| 303.0499                                | quercetin                               | external standard                  |
| 303.0499                                | delphinidin                             | external standard                  |
| 305.0656                                | taxifolin                               | external standard                  |
| 317.0656                                | isorhamnetin                            | external standard                  |
| 319.0448                                | myricetin                               | external standard                  |
| 579.1497                                | procyanidin (B1. B2)                    | external standard                  |
| 867.2131                                | procyanidin trimer (C1. C2 and others)  | proanthocyanidin                   |
| 547.1599                                | propelargonidin dimer                   | proanthocyanidin                   |
| 819.2283                                | propelargonidin trimer                  | proanthocyanidin                   |
| 611.1395                                | prodelphinidin dimer                    | proanthocyanidin                   |
| 915.1978                                | prodelphinidin trimer                   | proanthocyanidin                   |
| 271.0601                                | apigenin                                | other (from pathway. see Figure 1) |
| 273.7574                                | chalcone (tetrahydroxy-chalcone)        | other (from pathway. see Figure 1) |
| 275.0914                                | afzelechin                              | other (from pathway. see Figure 1) |
| 275.0914                                | epiafzelechin                           | other (from pathway. see Figure 1) |
| 287.0550                                | luteolin                                | other (from pathway. see Figure 1) |
| 289.0707                                | dihydrokaempferol                       | other (from pathway. see Figure 1) |
| 289.0707                                | eriodictyol                             | other (from pathway. see Figure 1) |
| 291.0863                                | leucopelargonidin                       | other (from pathway. see Figure 1) |
| 301.0707                                | peonidin                                | other (from pathway. see Figure 1) |
| 305.0656                                | pentahydroxyflavanone (dihydrotricetin) | other (from pathway. see Figure 1) |
| 307.0812                                | leucocyanidin                           | other (from pathway. see Figure 1) |
| 307.0812                                | epigallocatechin                        | other (from pathway. see Figure 1) |
| 307.0812                                | gallocatechin                           | other (from pathway. see Figure 1) |
| 317.0656                                | petunidin                               | other (from pathway. see Figure 1) |
| 321.0605                                | dihydromyricetin                        | other (from pathway. see Figure 1) |
| 323.0761                                | leucodelphinidin                        | other (from pathway. see Figure 1) |
| 331.0811                                | malvidin                                | other (from pathway. see Figure 1) |
| 290.1102                                | D3-sakuranetin                          | internal standard                  |
| 306.0664                                | D3-quercetin                            | internal standard                  |

For all used *m/z* ([M+H]<sup>+</sup>) for glycosylated core substances, see Table S3.

*m/z* values according to METLIN (Scripps Center for Metabolomics and Mass Spectrometry, [https://metlin.scripps.edu/metabo\\_advanced.php](https://metlin.scripps.edu/metabo_advanced.php)) or calculated using MoIE - Molecular Mass Calculator v2.02 (<http://mods.rna.albany.edu/masspec/MoIE>) by Jef Rozenski (1999).
