# Supplementary material for: A fast and simple LC-MS-based characterization of the flavonoid biosynthesis pathway for few seed(ling)s
Source: PubMed Central journal article supplement (PMC5007998; doi:10.1186/s12870-016-0880-7), 2016-09-01
Supplement: 12870_2016_880_MOESM4_ESM.pdf [file 12870_2016_880_MOESM4_ESM.pdf]

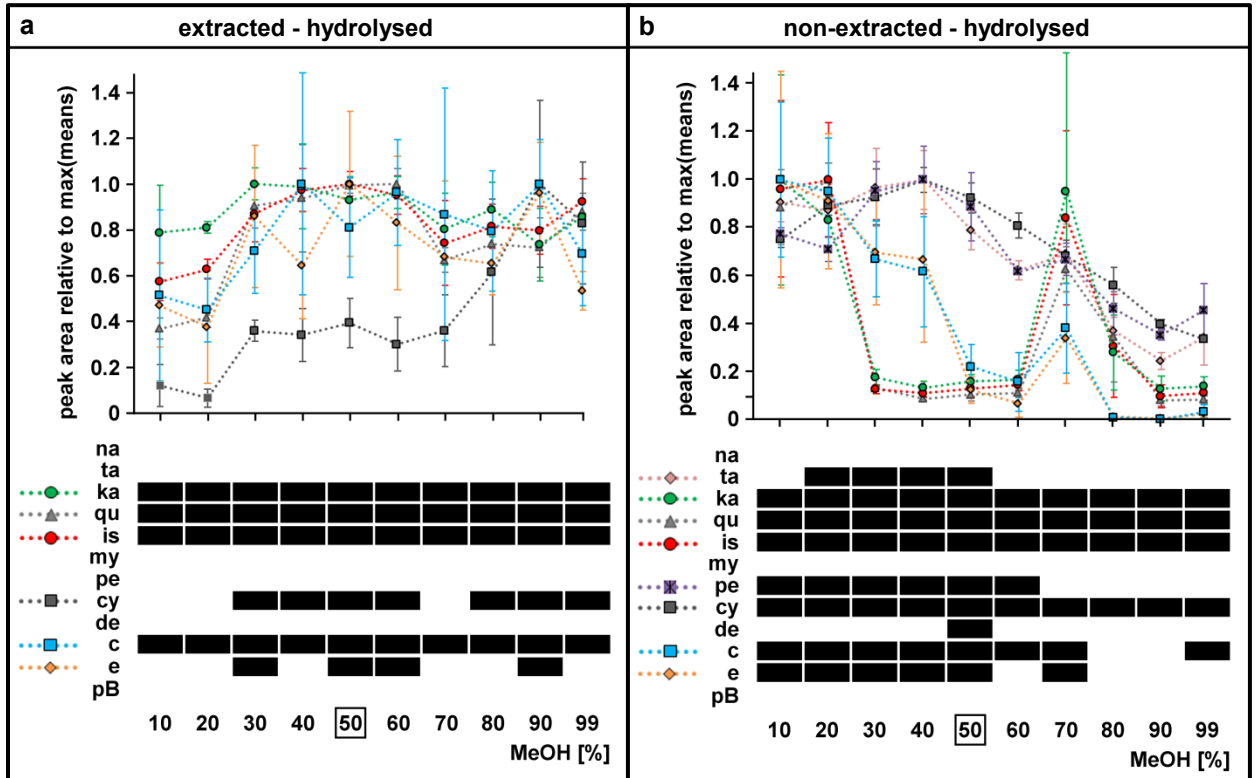

**Figure S4: Selection of the methanol concentration.**

LC-ESI-MS-QTRAP(MRM)-responses of flavonoids from the selected set for extracted hydrolysed (a) and non-extracted hydrolyzed (b) samples. For comparison, each response was set relative to the maximal mean per substance through all tested MeOH concentrations. Black boxes below the plots indicate when the limit of quantification (LOQ) was passed for the majority of respective replicates. Boxed: selected MeOH concentration. Note, that substances from the same class share a similar extraction behaviour. A different concentration can be chosen for specific purpose. Interrupted lines serve for visualization. n=3 Error bars = STDEV. (See Figure S5 for soluble samples and non-adjusted responses and Table S7 for the underlying data).

na: naringenin, ta: taxifolin, ka: kaempferol, qu: quercetin, is: isorhamnetin, my: myricetin, pe: pelargonidin, cy: cyanidin, de: delphinidin, c: catechin, e: epicatechin, pB: procyanidinB2.

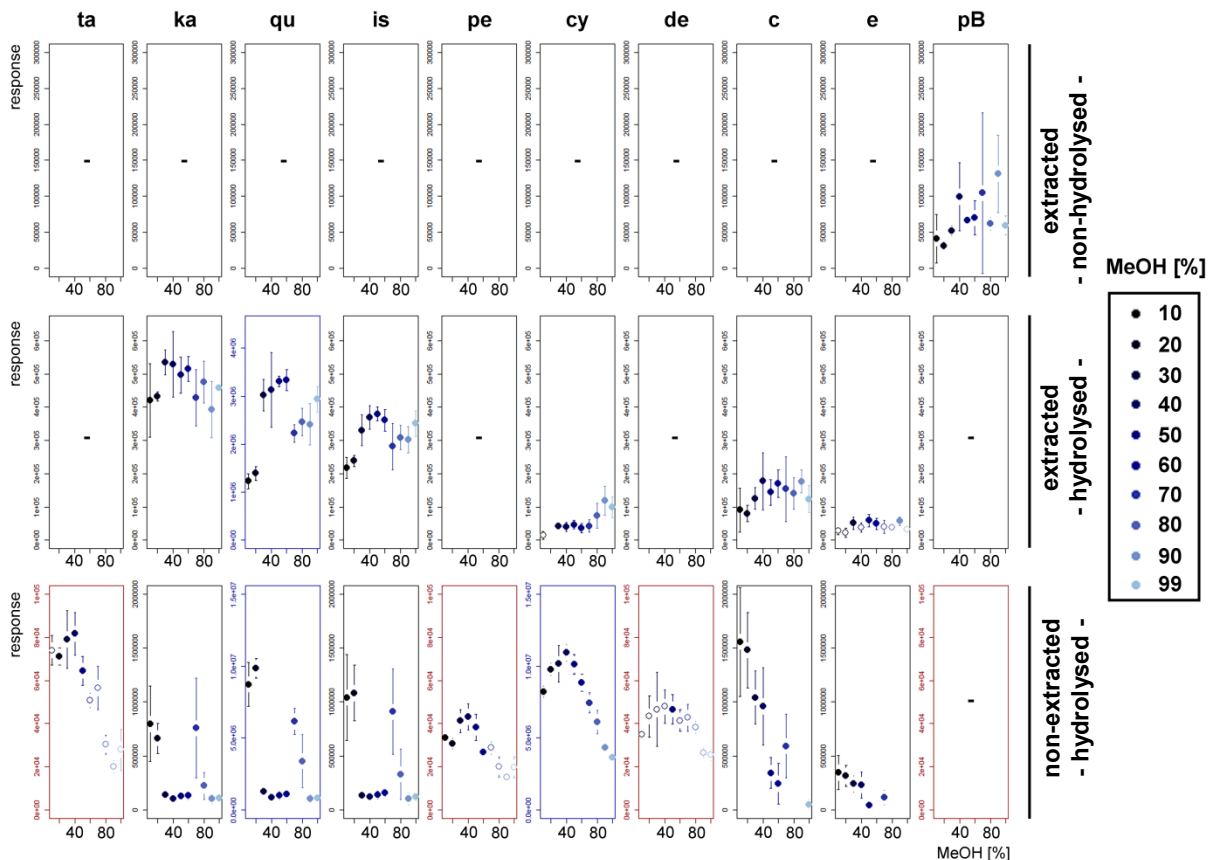

**Figure S5: Non-adjusted responses from Fig. S4.** Shown are non-adjusted responses for the ten detected substances corresponding to the data presented in Fig. S4 for extracted non-hydrolysed, extracted hydrolysed and non-extracted hydrolysed samples. The different MeOH concentrations in the solvent are indicated through a color code. Note, in each line, plots of the same scale are boxed in the same color. n=3. Error bars = STDEV. See Table S7 for the underlying data.

ta: taxifolin, ka: kaempferol, qu: quercetin, is: isorhamnetin, my: myricetin, pe: pelargonidin, cy: cyanidin, de: delphinidin, c: catechin, e: epicatechin, pB: procyanidinB2.

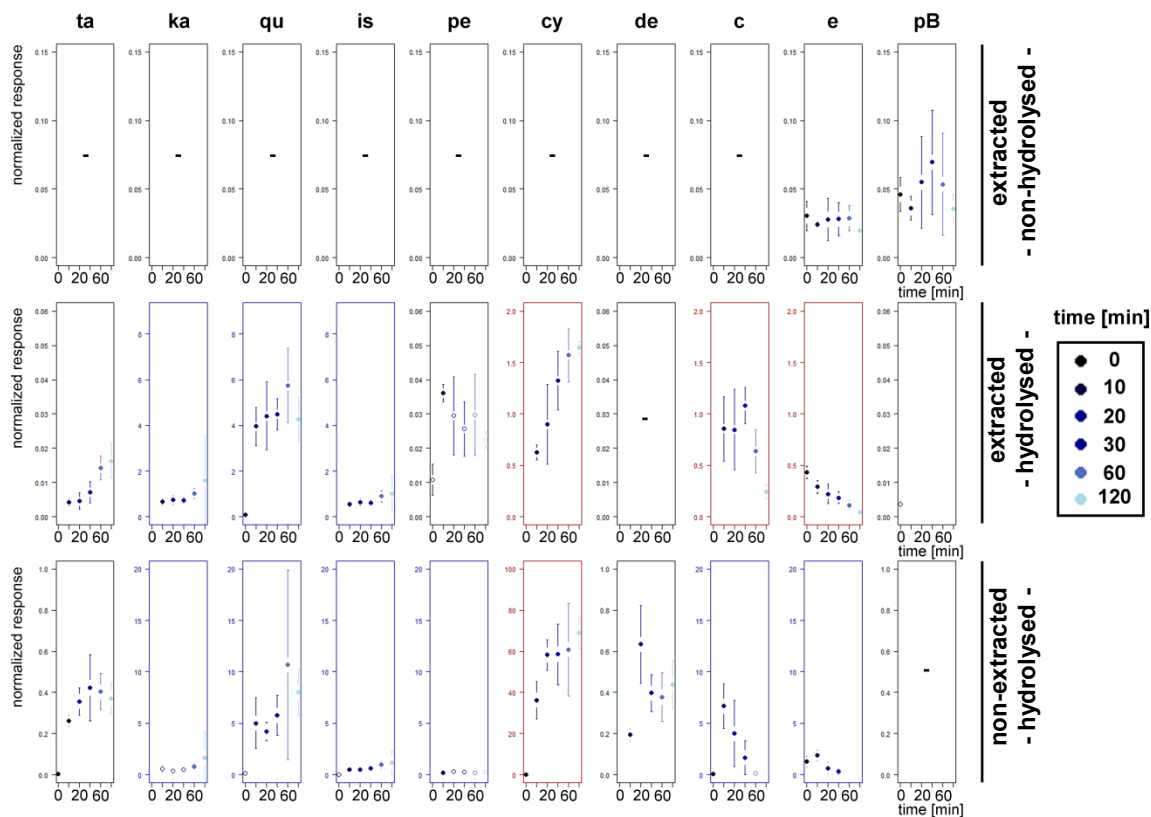

**Figure S6: Seed extracts treated with different hydrolysis times.**

Shown are responses normalized to the respective internal standard for the different indicated extracts and treatments. The different hydrolysis times are indicated as a color code. Extracted non-hydrolysed samples with the indicated time are not hydrolysed but correspond to the same initial seeds as the respective mean at this time for the hydrolysed samples. 10 seeds were used per sample in five replicates. Note, in each line, plots of the same scale are boxed in the same color. Filled dots: above LOQ. Empty dots: above LOD but below LOQ. Error bars = STDEV. (See Table S10 for the underlying data)

ta: taxifolin, ka: kaempferol, qu: quercetin, is: isorhamnetin, my: myricetin, pe: pelargonidin, cy: cyanidin, de: delphinidin, c: catechin, e: epicatechin, pB: procyanidinB2.

Table S9. Data for Fig. S4,S5

| Figure | MeOH [%] | Sample type               | Substance | LOD passed | LOQ passed | response | STDEV    | RSD [%] |
|--------|----------|---------------------------|-----------|------------|------------|----------|----------|---------|
| S5     | 10       | extracted, non-hydrolysed | pB2       | +          | +          | 4.15E+04 | 3.37E+04 | 81.17   |
|        | 20       |                           | pB2       | +          | +          | 3.16E+04 | 4.66E+03 | 14.73   |
|        | 30       |                           | pB2       | +          | +          | 5.24E+04 | 6.67E+03 | 12.74   |
|        | 40       |                           | pB2       | +          | +          | 9.95E+04 | 4.76E+04 | 47.84   |
|        | 50       |                           | pB2       | +          | +          | 6.69E+04 | 3.07E+03 | 4.60    |
|        | 60       |                           | pB2       | +          | +          | 7.00E+04 | 2.35E+04 | 33.62   |
|        | 70       |                           | pB2       | +          | +          | 1.05E+05 | 1.11E+05 | 106.56  |
|        | 80       |                           | pB2       | +          | +          | 6.21E+04 | 9.35E+03 | 15.06   |
|        | 90       |                           | pB2       | +          | +          | 1.31E+05 | 5.39E+04 | 41.00   |
| 99     | pB2      | +                         | +         | 5.95E+04   | 1.33E+04   | 22.30    |          |         |
| S4a,S5 | 10       | extracted, hydrolysed     | ka        | +          | +          | 4.21E+05 | 1.11E+05 | 26.24   |
|        |          |                           | qu        | +          | +          | 1.23E+06 | 1.56E+05 | 12.70   |
|        |          |                           | is        | +          | +          | 2.18E+05 | 3.17E+04 | 14.55   |
|        |          |                           | cy        | +          | -          | 1.44E+04 | 1.11E+04 | 77.01   |
|        |          |                           | c         | +          | +          | 9.10E+04 | 6.63E+04 | 72.79   |
| e      | +        | -                         | 2.79E+04  | 1.08E+04   | 38.77      |          |          |         |
| S4a,S5 | 20       | extracted, hydrolysed     | ka        | +          | +          | 4.33E+05 | 1.37E+04 | 3.15    |
|        |          |                           | qu        | +          | +          | 1.39E+06 | 1.46E+05 | 10.51   |
|        |          |                           | is        | +          | +          | 2.38E+05 | 1.63E+04 | 6.83    |
|        |          |                           | cy        | -          | -          | n.d.     | n.d.     | n.d.    |
|        |          |                           | c         | +          | +          | 7.98E+04 | 2.48E+04 | 31.09   |
| e      | +        | -                         | 2.24E+04  | 1.46E+04   | 65.32      |          |          |         |
| S4a,S5 | 30       | extracted, hydrolysed     | ka        | +          | +          | 5.35E+05 | 3.77E+04 | 7.05    |
|        |          |                           | qu        | +          | +          | 3.02E+06 | 3.29E+05 | 10.90   |
|        |          |                           | is        | +          | +          | 3.30E+05 | 4.66E+04 | 14.11   |
|        |          |                           | cy        | +          | +          | 4.27E+04 | 5.40E+03 | 12.66   |
|        |          |                           | c         | +          | +          | 1.26E+05 | 3.29E+04 | 26.17   |
| e      | +        | +                         | 5.10E+04  | 1.84E+04   | 36.10      |          |          |         |
| S4a,S5 | 40       | extracted, hydrolysed     | ka        | +          | +          | 5.29E+05 | 9.83E+04 | 18.59   |
|        |          |                           | qu        | +          | +          | 3.13E+06 | 7.82E+05 | 24.98   |
|        |          |                           | is        | +          | +          | 3.69E+05 | 3.51E+04 | 9.50    |
|        |          |                           | cy        | +          | +          | 4.05E+04 | 1.37E+04 | 33.88   |
|        |          |                           | c         | +          | +          | 1.77E+05 | 8.58E+04 | 48.40   |
| e      | +        | -                         | 3.82E+04  | 1.39E+04   | 36.23      |          |          |         |

**Table S9. Data for Fig. S4,S5**

| Figure | MeOH [%] | Sample type              | Substance | LOD passed | LOQ passed | response | STDEV    | RSD [%] |
|--------|----------|--------------------------|-----------|------------|------------|----------|----------|---------|
| S4a,S5 | 50       | extracted,<br>hydrolysed | ka        | +          | +          | 4.97E+05 | 5.46E+04 | 11.00   |
|        |          |                          | qu        | +          | +          | 3.31E+06 | 1.10E+05 | 3.31    |
|        |          |                          | is        | +          | +          | 3.80E+05 | 2.07E+04 | 5.46    |
|        |          |                          | cy        | +          | +          | 4.68E+04 | 1.28E+04 | 27.30   |
|        |          |                          | c         | +          | +          | 1.44E+05 | 3.86E+04 | 26.89   |
|        |          |                          | e         | +          | +          | 5.95E+04 | 1.88E+04 | 31.69   |
| S4a,S5 | 60       | extracted,<br>hydrolysed | ka        | +          | +          | 5.15E+05 | 3.72E+04 | 7.23    |
|        |          |                          | qu        | +          | +          | 3.34E+06 | 2.17E+05 | 6.51    |
|        |          |                          | is        | +          | +          | 3.61E+05 | 3.19E+04 | 8.84    |
|        |          |                          | cy        | +          | +          | 3.57E+04 | 1.40E+04 | 39.08   |
|        |          |                          | c         | +          | +          | 1.71E+05 | 4.11E+04 | 24.06   |
|        |          |                          | e         | +          | +          | 4.93E+04 | 1.73E+04 | 35.14   |
| S4a,S5 | 70       | extracted,<br>hydrolysed | ka        | +          | +          | 4.29E+05 | 8.45E+04 | 19.71   |
|        |          |                          | qu        | +          | +          | 2.22E+06 | 1.80E+05 | 8.08    |
|        |          |                          | is        | +          | +          | 2.82E+05 | 6.98E+04 | 24.78   |
|        |          |                          | cy        | +          | +          | 4.28E+04 | 1.86E+04 | 43.52   |
|        |          |                          | c         | +          | +          | 1.54E+05 | 9.76E+04 | 63.48   |
|        |          |                          | e         | +          | -          | 4.05E+04 | 1.96E+04 | 48.43   |
| S4a,S5 | 80       | extracted,<br>hydrolysed | ka        | +          | +          | 4.75E+05 | 6.30E+04 | 13.27   |
|        |          |                          | qu        | +          | +          | 2.46E+06 | 2.86E+05 | 11.60   |
|        |          |                          | is        | +          | +          | 3.09E+05 | 3.68E+04 | 11.90   |
|        |          |                          | cy        | +          | +          | 7.32E+04 | 3.78E+04 | 51.63   |
|        |          |                          | c         | +          | +          | 1.41E+05 | 4.66E+04 | 33.11   |
|        |          |                          | e         | +          | -          | 3.88E+04 | 8.21E+03 | 21.15   |
| S4a,S5 | 90       | extracted,<br>hydrolysed | ka        | +          | +          | 3.93E+05 | 8.48E+04 | 21.57   |
|        |          |                          | qu        | +          | +          | 2.41E+06 | 4.33E+05 | 17.96   |
|        |          |                          | is        | +          | +          | 3.03E+05 | 3.92E+04 | 12.97   |
|        |          |                          | cy        | +          | +          | 1.19E+05 | 4.33E+04 | 36.37   |
|        |          |                          | c         | +          | +          | 1.77E+05 | 3.46E+04 | 19.55   |
|        |          |                          | e         | +          | +          | 5.71E+04 | 1.31E+04 | 22.88   |
| S4a,S5 | 99       | extracted,<br>hydrolysed | ka        | +          | +          | 4.58E+05 | 6.56E+03 | 1.43    |
|        |          |                          | qu        | +          | +          | 2.93E+06 | 2.71E+05 | 9.25    |
|        |          |                          | is        | +          | +          | 3.51E+05 | 3.79E+04 | 10.80   |
|        |          |                          | cy        | +          | +          | 9.86E+04 | 3.17E+04 | 32.17   |
|        |          |                          | c         | +          | +          | 1.23E+05 | 4.03E+04 | 32.73   |
|        |          |                          | e         | +          | -          | 3.17E+04 | 4.93E+03 | 15.54   |

Table S9. Data for Fig. S4,S5

| Figure | MeOH [%] | Sample type               | Substance | LOD passed | LOQ passed | response | STDEV    | RSD [%] |
|--------|----------|---------------------------|-----------|------------|------------|----------|----------|---------|
| S4b,S5 | 10       | non-extracted, hydrolysed | ta        | +          | -          | 7.39E+04 | 6.77E+03 | 9.15    |
|        |          |                           | ka        | +          | +          | 7.97E+05 | 3.49E+05 | 43.78   |
|        |          |                           | qu        | +          | +          | 8.72E+06 | 1.53E+06 | 17.55   |
|        |          |                           | is        | +          | +          | 1.04E+06 | 3.96E+05 | 38.03   |
|        |          |                           | pe        | +          | +          | 3.35E+04 | 1.10E+03 | 3.29    |
|        |          |                           | cy        | +          | +          | 8.22E+06 | 3.79E+05 | 4.61    |
|        |          |                           | de        | +          | -          | 3.51E+04 | 1.12E+03 | 3.18    |
|        |          |                           | c         | +          | +          | 1.56E+06 | 5.03E+05 | 32.33   |
| S4b,S5 | 20       | non-extracted, hydrolysed | e         | +          | +          | 3.48E+05 | 1.57E+05 | 45.16   |
|        |          |                           | ta        | +          | +          | 7.11E+04 | 3.90E+03 | 5.48    |
|        |          |                           | ka        | +          | +          | 6.64E+05 | 1.39E+05 | 20.86   |
|        |          |                           | qu        | +          | +          | 9.84E+06 | 6.91E+05 | 7.02    |
|        |          |                           | is        | +          | +          | 1.08E+06 | 2.58E+05 | 23.85   |
|        |          |                           | pe        | +          | +          | 3.07E+04 | 2.31E+03 | 7.51    |
|        |          |                           | cy        | +          | +          | 9.76E+06 | 4.35E+05 | 4.46    |
|        |          |                           | de        | +          | -          | 4.34E+04 | 9.49E+03 | 21.88   |
| S4b,S5 | 30       | non-extracted, hydrolysed | c         | +          | +          | 1.48E+06 | 3.47E+05 | 23.42   |
|        |          |                           | e         | +          | +          | 3.17E+05 | 9.82E+04 | 31.01   |
|        |          |                           | ta        | +          | +          | 7.90E+04 | 1.33E+04 | 16.83   |
|        |          |                           | ka        | +          | +          | 1.40E+05 | 2.61E+04 | 18.60   |
|        |          |                           | qu        | +          | +          | 1.30E+06 | 5.03E+04 | 3.86    |
|        |          |                           | is        | +          | +          | 1.38E+05 | 2.04E+04 | 14.80   |
|        |          |                           | pe        | +          | +          | 4.12E+04 | 5.20E+03 | 12.61   |
|        |          |                           | cy        | +          | +          | 1.02E+07 | 1.28E+06 | 12.58   |
| S4b,S5 | 40       | non-extracted, hydrolysed | de        | +          | -          | 4.66E+04 | 1.71E+04 | 36.74   |
|        |          |                           | c         | +          | +          | 1.04E+06 | 2.46E+05 | 23.59   |
|        |          |                           | e         | +          | +          | 2.42E+05 | 7.57E+04 | 31.22   |
|        |          |                           | ta        | +          | +          | 8.16E+04 | 9.98E+03 | 12.23   |
|        |          |                           | ka        | +          | +          | 1.06E+05 | 2.07E+04 | 19.52   |
|        |          |                           | qu        | +          | +          | 8.58E+05 | 7.14E+04 | 8.32    |
|        |          |                           | is        | +          | +          | 1.20E+05 | 1.89E+04 | 15.73   |
|        |          |                           | pe        | +          | +          | 4.32E+04 | 6.13E+03 | 14.19   |
| S4b,S5 | 40       | non-extracted, hydrolysed | cy        | +          | +          | 1.09E+07 | 5.69E+05 | 5.20    |
|        |          |                           | de        | +          | -          | 4.80E+04 | 7.74E+03 | 16.14   |
|        |          |                           | c         | +          | +          | 9.60E+05 | 3.57E+05 | 37.21   |
| S4b,S5 | 40       | non-extracted, hydrolysed | e         | +          | +          | 2.32E+05 | 1.20E+05 | 51.56   |

Table S9. Data for Fig. S4,S5

| Figure | MeOH [%] | Sample type               | Substance | LOD passed | LOQ passed | response | STDEV    | RSD [%] |
|--------|----------|---------------------------|-----------|------------|------------|----------|----------|---------|
| S4b,S5 | 50       | non-extracted, hydrolysed | ta        | +          | +          | 6.45E+04 | 6.60E+03 | 10.24   |
|        |          |                           | ka        | +          | +          | 1.27E+05 | 2.20E+04 | 17.34   |
|        |          |                           | qu        | +          | +          | 1.03E+06 | 2.64E+05 | 25.69   |
|        |          |                           | is        | +          | +          | 1.41E+05 | 3.61E+04 | 25.67   |
|        |          |                           | pe        | +          | +          | 3.84E+04 | 6.15E+03 | 16.03   |
|        |          |                           | cy        | +          | +          | 1.01E+07 | 6.88E+05 | 6.80    |
|        |          |                           | de        | +          | +          | 4.66E+04 | 6.85E+03 | 14.71   |
|        |          |                           | c         | +          | +          | 3.45E+05 | 1.43E+05 | 41.44   |
| S4b,S5 | 60       | non-extracted, hydrolysed | e         | +          | +          | 4.32E+04 | 1.93E+04 | 44.79   |
|        |          |                           | ta        | +          | -          | 5.08E+04 | 3.33E+03 | 6.55    |
|        |          |                           | ka        | +          | +          | 1.33E+05 | 3.21E+04 | 24.10   |
|        |          |                           | qu        | +          | +          | 1.10E+06 | 1.81E+05 | 16.50   |
|        |          |                           | is        | +          | +          | 1.58E+05 | 2.89E+04 | 18.34   |
|        |          |                           | pe        | +          | +          | 2.67E+04 | 4.93E+02 | 1.85    |
|        |          |                           | cy        | +          | +          | 8.85E+06 | 5.81E+05 | 6.56    |
|        |          |                           | de        | +          | -          | 4.15E+04 | 5.06E+03 | 12.18   |
| S4b,S5 | 70       | non-extracted, hydrolysed | c         | +          | +          | 2.45E+05 | 1.90E+05 | 77.49   |
|        |          |                           | e         | -          | -          | n.d.     | n.d.     | n.d.    |
|        |          |                           | ta        | +          | -          | 5.65E+04 | 1.00E+04 | 17.79   |
|        |          |                           | ka        | +          | +          | 7.59E+05 | 4.60E+05 | 60.52   |
|        |          |                           | qu        | +          | +          | 6.16E+06 | 9.17E+05 | 14.87   |
|        |          |                           | is        | +          | +          | 9.11E+05 | 3.94E+05 | 43.25   |
|        |          |                           | pe        | +          | -          | 2.89E+04 | 2.93E+03 | 10.14   |
|        |          |                           | cy        | +          | +          | 7.45E+06 | 7.20E+05 | 9.66    |
| S4b,S5 | 80       | non-extracted, hydrolysed | de        | +          | -          | 4.28E+04 | 6.16E+03 | 14.38   |
|        |          |                           | c         | +          | +          | 5.93E+05 | 2.92E+05 | 49.30   |
|        |          |                           | e         | +          | +          | 1.18E+05 | 6.63E+04 | 56.02   |
|        |          |                           | ta        | +          | -          | 3.03E+04 | 4.49E+03 | 14.83   |
|        |          |                           | ka        | +          | +          | 2.24E+05 | 1.24E+05 | 55.62   |
|        |          |                           | qu        | +          | +          | 3.40E+06 | 1.85E+06 | 54.31   |
|        |          |                           | is        | +          | +          | 3.32E+05 | 2.31E+05 | 69.50   |
|        |          |                           | pe        | +          | -          | 2.00E+04 | 4.73E+03 | 23.67   |
| S4b,S5 | 80       | non-extracted, hydrolysed | cy        | +          | +          | 6.13E+06 | 8.18E+05 | 13.35   |
|        |          |                           | de        | +          | -          | 3.83E+04 | 2.61E+03 | 6.80    |
|        |          |                           | c         | -          | -          | n.d.     | n.d.     | n.d.    |
|        |          |                           | e         | -          | -          | n.d.     | n.d.     | n.d.    |

**Table S9. Data for Fig. S4,S5**

| Figure | MeOH [%] | Sample type               | Substance | LOD passed | LOQ passed | response | STDEV    | RSD [%] |
|--------|----------|---------------------------|-----------|------------|------------|----------|----------|---------|
| S4b,S5 | 90       | non-extracted, hydrolysed | ta        | +          | -          | 2.00E+04 | 2.92E+03 | 14.60   |
|        |          |                           | ka        | +          | +          | 1.03E+05 | 4.11E+04 | 39.89   |
|        |          |                           | qu        | +          | +          | 7.97E+05 | 2.58E+05 | 32.43   |
|        |          |                           | is        | +          | +          | 1.06E+05 | 5.25E+04 | 49.59   |
|        |          |                           | pe        | +          | -          | 1.52E+04 | 9.07E+02 | 5.96    |
|        |          |                           | cy        | +          | +          | 4.36E+06 | 1.95E+05 | 4.48    |
|        |          |                           | de        | +          | -          | 2.65E+04 | 2.15E+03 | 8.12    |
|        |          |                           | c         | -          | -          | n.d.     | n.d.     | n.d.    |
| e      | -        | -                         | n.d.      | n.d.       | n.d.       |          |          |         |
| S4b,S5 | 99       | non-extracted, hydrolysed | ta        | +          | -          | 2.80E+04 | 9.52E+03 | 34.03   |
|        |          |                           | ka        | +          | +          | 1.11E+05 | 3.09E+04 | 27.76   |
|        |          |                           | qu        | +          | +          | 8.27E+05 | 1.42E+05 | 17.21   |
|        |          |                           | is        | +          | +          | 1.21E+05 | 3.49E+04 | 28.95   |
|        |          |                           | pe        | +          | -          | 1.97E+04 | 4.82E+03 | 24.43   |
|        |          |                           | cy        | +          | +          | 3.66E+06 | 1.35E+05 | 3.69    |
|        |          |                           | de        | +          | -          | 2.54E+04 | 2.69E+03 | 10.56   |
|        |          |                           | c         | +          | +          | 5.08E+04 | 4.62E+04 | 90.93   |
| e      | -        | -                         | n.d.      | n.d.       | n.d.       |          |          |         |

For experimental procedures see methods, text and Fig. S4 and Fig. S5. The number of replicates is three. Note that for each samples type, only data is shown for substances for which at least on MeOH concentration was above LOQ. "n.d." = not determined., "ta" = taxifolin, "ka" = kaempferol, "qu" = quercetin, "is" = isorhamnetin, "pe" = pelargonidin, "cy" = cyanidin, "de" = delphinidin, "c"= catechin, "e"=epicatechin, "pB2" = procyanidin B2. For LOD/LOQ see methods. Responses below LOQ were only used for plotting in Fig. S5 but not for drawing the decision.



**Table S10. Data for Fig. 2 and Figure S6**

| Figure | Hydrolysis [min] | Sample type          | Substance | LOD passed | LOQ passed | Normalized response | STDEV | RSD [%] | Compared to     | P-value |
|--------|------------------|----------------------|-----------|------------|------------|---------------------|-------|---------|-----------------|---------|
| S6     | 0                | extracted            | e         | +          | +          | 0.031               | 0.011 | 35.08   | n.d.            | n.d.    |
|        |                  | non-hydrolysed       | pB2       | +          | +          | 0.046               | 0.012 | 26.30   |                 |         |
| S6     | 10               | extracted            | e         | +          | +          | 0.024               | 0.002 | 8.36    |                 |         |
|        |                  | non-hydrolysed       | pB2       | +          | +          | 0.036               | 0.009 | 23.93   |                 |         |
| S6     | 20               | extracted            | e         | +          | +          | 0.028               | 0.016 | 55.60   |                 |         |
|        |                  | non-hydrolysed       | pB2       | +          | +          | 0.055               | 0.034 | 60.92   |                 |         |
| S6     | 30               | extracted            | e         | +          | -          | 0.028               | 0.012 | 42.51   |                 |         |
|        |                  | non-hydrolysed       | pB2       | +          | +          | 0.070               | 0.038 | 54.46   |                 |         |
| S6     | 60               | extracted            | e         | +          | +          | 0.029               | 0.009 | 31.60   |                 |         |
|        |                  | non-hydrolysed       | pB2       | +          | +          | 0.054               | 0.037 | 69.11   |                 |         |
| S6     | 120              | extracted            | e         | +          | +          | 0.019               | 0.005 | 24.32   |                 |         |
|        |                  | non-hydrolysed       | pB2       | +          | +          | 0.036               | 0.010 | 27.94   |                 |         |
| 2, S6  | 0                | extracted hydrolysed | ta        | -          | -          | n.d.                | n.d.  | n.d.    | n.d.            | n.d.    |
|        |                  |                      | ka        | -          | -          | n.d.                | n.d.  | n.d.    | n.d.            | n.d.    |
|        |                  |                      | qu        | +          | +          | 0.092               | 0.031 | 33.85   | 10/20/30/60/120 | <0.01   |
|        |                  |                      | is        | -          | -          | n.d.                | n.d.  | n.d.    | n.d.            | n.d.    |
|        |                  |                      | pe        | +          | -          | 0.011               | 0.005 | 42.68   | 10/20/30/60/120 | <0.05   |
|        |                  |                      | cy        | -          | -          | n.d.                | n.d.  | n.d.    | n.d.            | n.d.    |
|        |                  |                      | c         | -          | -          | n.d.                | n.d.  | n.d.    | n.d.            | n.d.    |
|        |                  |                      | e         | +          | +          | 0.433               | 0.061 | 13.99   | 10/20/30/60/120 | <0.01   |
|        |                  |                      | pB        | +          | -          | 0.004               | 0.001 | 28.66   | n.d.            | n.d.    |
| 2, S6  | 10               | extracted hydrolysed | ta        | +          | +          | 0.004               | 0.001 | 26.00   | 60/120*         | <0.01   |
|        |                  |                      | ka        | +          | +          | 0.676               | 0.138 | 20.47   | 60*             | <0.05   |
|        |                  |                      | qu        | +          | +          | 3.955               | 0.828 | 20.93   | 0*              | <0.001  |
|        |                  |                      | is        | +          | +          | 0.548               | 0.093 | 16.89   | 60*             | <0.05   |
|        |                  |                      | pe        | +          | +          | 0.036               | 0.003 | 7.18    | 0/30/120*       | <0.05   |
|        |                  |                      | cy        | +          | +          | 0.628               | 0.073 | 11.70   | 30/60/120*      | <0.01   |
|        |                  |                      | c         | +          | +          | 0.855               | 0.314 | 36.69   | 120*            | <0.05   |
|        |                  |                      | e         | +          | +          | 0.291               | 0.066 | 22.54   | 0/30/60/120*    | <0.05   |
|        |                  |                      | pB        | -          | -          | n.d.                | n.d.  | n.d.    | n.d.            | n.d.    |

**Table S10. Data for Fig. 2 and Figure S6**

| Figure | Hydrolysis [min] | Sample type          | Substance | LOD passed | LOQ passed | Normalized response | STDEV | RSD [%] | Compared to   | P-value |
|--------|------------------|----------------------|-----------|------------|------------|---------------------|-------|---------|---------------|---------|
| 2, S6  | 20               | extracted hydrolysed | ta        | +          | +          | 0.005               | 0.002 | 52.42   | 60/120*       | <0.01   |
|        |                  |                      | ka        | +          | +          | 0.741               | 0.186 | 25.12   | 60*           | <0.05   |
|        |                  |                      | qu        | +          | +          | 4.413               | 1.495 | 33.88   | 0*            | <0.01   |
|        |                  |                      | is        | +          | +          | 0.645               | 0.154 | 23.87   | all           | >0.05   |
|        |                  |                      | pe        | +          | -          | 0.029               | 0.011 | 38.65   | 0*            | <0.05   |
|        |                  |                      | cy        | +          | +          | 0.900               | 0.389 | 43.29   | 60/120*       | <0.05   |
|        |                  |                      | c         | +          | +          | 0.848               | 0.394 | 46.44   | 120*          | <0.05   |
|        |                  |                      | e         | +          | +          | 0.221               | 0.094 | 42.64   | 0/120*        | <0.05   |
| pB     | -                | -                    | n.d       | n.d        | n.d        | n.d                 | n.d   | n.d     |               |         |
| 2, S6  | 30               | extracted hydrolysed | ta        | +          | +          | 0.007               | 0.003 | 42.77   | 60/120*       | <0.05   |
|        |                  |                      | ka        | +          | +          | 0.721               | 0.144 | 19.95   | 30*           | <0.05   |
|        |                  |                      | qu        | +          | +          | 4.485               | 0.688 | 15.34   | 0*            | <0.001  |
|        |                  |                      | is        | +          | +          | 0.620               | 0.097 | 15.62   | all           | >0.05   |
|        |                  |                      | pe        | +          | -          | 0.026               | 0.008 | 31.14   | 0/10*         | <0.05   |
|        |                  |                      | cy        | +          | +          | 1.325               | 0.286 | 21.56   | 10*           | <0.01   |
|        |                  |                      | c         | +          | +          | 1.081               | 0.175 | 16.19   | 60/120*       | <0.01   |
|        |                  |                      | e         | +          | +          | 0.187               | 0.057 | 30.32   | 0/10/120*     | <0.05   |
| pB     | -                | -                    | n.d       | n.d        | n.d        | n.d.                | n.d.  | n.d.    |               |         |
| 2, S6  | 60               | extracted hydrolysed | ta        | +          | +          | 0.014               | 0.003 | 23.79   | 10/20/30*     | <0.01   |
|        |                  |                      | ka        | +          | +          | 1.028               | 0.221 | 21.44   | 10/30*        | <0.05   |
|        |                  |                      | qu        | +          | +          | 5.752               | 1.615 | 28.09   | 0*            | <0.001  |
|        |                  |                      | is        | +          | +          | 0.896               | 0.259 | 28.87   | 10*           | <0.05   |
|        |                  |                      | pe        | +          | -          | 0.030               | 0.012 | 39.62   | 0*            | <0.05   |
|        |                  |                      | cy        | +          | +          | 1.571               | 0.260 | 16.53   | 10/20*        | <0.05   |
|        |                  |                      | c         | +          | +          | 0.637               | 0.211 | 33.18   | 30/120*       | <0.05   |
|        |                  |                      | e         | +          | +          | 0.113               | 0.044 | 38.71   | 0/10/120*     | <0.05   |
| pB     | -                | -                    | n.d       | n.d        | n.d        | n.d.                | n.d.  | n.d     |               |         |
| 2, S6  | 120              | extracted hydrolysed | ta        | +          | +          | 0.016               | 0.005 | 30.17   | 10/20/30*     | <0.05   |
|        |                  |                      | ka        | +          | +          | 1.603               | 1.933 | 120.62  | all           | >0.05   |
|        |                  |                      | qu        | +          | +          | 4.260               | 0.965 | 22.64   | 0*            | <0.001  |
|        |                  |                      | is        | +          | +          | 1.021               | 0.796 | 77.93   | all           | >0.05   |
|        |                  |                      | pe        | +          | -          | 0.022               | 0.002 | 10.52   | 0/10*         | <0.01   |
|        |                  |                      | cy        | +          | +          | 1.649               | 0.061 | 3.71    | 10/20*        | <0.05   |
|        |                  |                      | c         | +          | +          | 0.244               | 0.066 | 27.03   | 10/20/30/60   | <0.05   |
|        |                  |                      | e         | +          | +          | 0.042               | 0.013 | 31.94   | 0/10/20/30/60 | <0.05   |
| pB     | -                | -                    | n.d.      | n.d.       | n.d        | n.d.                | n.d   |         |               |         |

**Table S10. Data for Fig. 2 and Figure S6**

| Figure | Hydrolysis [min] | Sample type              | Substance | LOD passed | LOQ passed | Normalized response | STDEV  | RSD [%] | Compared to       | P-value |
|--------|------------------|--------------------------|-----------|------------|------------|---------------------|--------|---------|-------------------|---------|
| 2, S6  | 0                | non-extracted hydrolysed | ta        | +          | +          | 0.003               | 0.002  | 79.15   | 0/10/20/30/60/120 | <0.01   |
|        |                  |                          | ka        | -          | -          | n.d                 | n.d    | n.d     | n.d.              | n.d     |
|        |                  |                          | qu        | +          | -          | 0.148               | 0.055  | 37.00   | 10/20/30/120*     | <0.05   |
|        |                  |                          | is        | +          | -          | 0.023               | 0.007  | 29.02   | 10/20/30/60*      | <0.01   |
|        |                  |                          | pe        | -          | -          | n.d                 | n.d    | n.d     | n.d.              | n.d.    |
|        |                  |                          | cy        | +          | +          | 0.085               | 0.035  | 40.84   | 10/20/30/60/120   | <0.01   |
|        |                  |                          | de        | -          | -          | n.d.                | n.d.   | n.d     | n.d.              | n.d.    |
|        |                  |                          | c         | +          | +          | 0.101               | 0.033  | 32.37   | 10*               | <0.01   |
| 2, S6  | 10               | non-extracted hydrolysed | e         | +          | +          | 1.268               | 0.525  | 41.41   | 30*               | <0.05   |
|        |                  |                          | ta        | +          | +          | 0.262               | 0.026  | 10.03   | 0/20/60/120*      | <0.05   |
|        |                  |                          | ka        | +          | -          | 0.573               | 0.296  | 51.63   | all               | >0.05   |
|        |                  |                          | qu        | +          | +          | 5.019               | 2.440  | 48.60   | 0*                | <0.05   |
|        |                  |                          | is        | +          | +          | 0.477               | 0.155  | 32.43   | 0/60*             | <0.05   |
|        |                  |                          | pe        | +          | +          | 0.207               | 0.067  | 32.34   | 20*               | <0.05   |
|        |                  |                          | cy        | +          | +          | 36.306              | 9.108  | 25.09   | 0/20/30/120*      | <0.05   |
|        |                  |                          | de        | +          | +          | 0.194               | 0.028  | 14.58   | 20/30/60/120      | <0.05   |
| 2, S6  | 20               | non-extracted hydrolysed | c         | +          | +          | 6.680               | 2.154  | 32.24   | 0/30/60*          | <0.01   |
|        |                  |                          | e         | +          | +          | 1.873               | 0.498  | 26.57   | 20/30*            | <0.01   |
|        |                  |                          | ta        | +          | +          | 0.357               | 0.067  | 18.68   | 0/10*             | <0.05   |
|        |                  |                          | ka        | +          | -          | 0.374               | 0.076  | 20.20   | 60*               | <0.05   |
|        |                  |                          | qu        | +          | +          | 4.197               | 0.906  | 21.59   | 0*                | <0.001  |
|        |                  |                          | is        | +          | +          | 0.505               | 0.044  | 8.77    | 0*                | <0.001  |
|        |                  |                          | pe        | +          | +          | 0.318               | 0.059  | 18.40   | 10/60/120*        | <0.05   |
|        |                  |                          | cy        | +          | +          | 58.212              | 7.330  | 12.59   | 0/10*             | <0.01   |
| 2, S6  | 30               | non-extracted hydrolysed | de        | +          | +          | 0.634               | 0.191  | 30.08   | 10/30/60*         | <0.05   |
|        |                  |                          | c         | +          | +          | 4.009               | 3.211  | 80.10   | all               | >0.05   |
|        |                  |                          | e         | +          | +          | 0.644               | 0.561  | 87.06   | 10*               | <0.01   |
|        |                  |                          | ta        | +          | +          | 0.423               | 0.161  | 38.04   | 0*                | <0.01   |
|        |                  |                          | ka        | +          | -          | 0.497               | 0.149  | 30.00   | 60*               | <0.05   |
|        |                  |                          | qu        | +          | +          | 5.764               | 1.933  | 33.53   | 0*                | <0.01   |
|        |                  |                          | is        | +          | +          | 0.613               | 0.141  | 23.04   | 0*                | <0.001  |
|        |                  |                          | pe        | +          | +          | 0.249               | 0.082  | 32.72   | all               | >0.05   |
| 2, S6  | 30               | non-extracted hydrolysed | cy        | +          | +          | 58.624              | 14.715 | 25.10   | 0/10*             | <0.05   |
|        |                  |                          | de        | +          | +          | 0.398               | 0.090  | 22.55   | 10/20*            | <0.05   |
|        |                  |                          | c         | +          | +          | 1.676               | 1.649  | 98.37   | 10*               | <0.01   |
|        |                  |                          | e         | +          | +          | 0.297               | 0.288  | 97.05   | 0/10*             | <0.05   |

**Table S10. Data for Fig. 2 and Figure S6**

| Figure | Hydrolysis [min] | Sample type              | Substance | LOD passed | LOQ passed | Normalized response | STDEV  | RSD [%] | Compared to | P-value |
|--------|------------------|--------------------------|-----------|------------|------------|---------------------|--------|---------|-------------|---------|
| 2, S6  | 60               | non-extracted hydrolysed | ta        | +          | +          | 0.404               | 0.089  | 21.96   | 0/10*       | <0.05   |
|        |                  |                          | ka        | +          | +          | 0.835               | 0.241  | 28.92   | 20/30*      | <0.05   |
|        |                  |                          | qu        | +          | +          | 10.675              | 9.176  | 85.96   | all         | >0.05   |
|        |                  |                          | is        | +          | +          | 0.994               | 0.420  | 42.24   | 0/10*       | <0.05   |
|        |                  |                          | pe        | +          | +          | 0.206               | 0.057  | 27.84   | 20*         | <0.05   |
|        |                  |                          | cy        | +          | +          | 60.902              | 22.446 | 36.86   | 0*          | <0.01   |
|        |                  |                          | de        | -          | -          | 0.377               | 0.118  | 31.30   | 10/20*      | <0.01   |
|        |                  |                          | c         | +          | -          | 0.128               | 0.091  | 71.34   | 10*         | <0.01   |
|        |                  |                          | e         | -          | -          | n.d                 | n.d    | n.d     | n.d.        |         |
| 2, S6  | 120              | non-extracted hydrolysed | ta        | +          | +          | 0.371               | 0.076  | 20.45   | 0/10*       | <0.05   |
|        |                  |                          | ka        | +          | +          | 1.68                | 2.491  | 148.10  | all         | >0.05   |
|        |                  |                          | qu        | +          | +          | 8.000               | 2.209  | 27.61   | 0/20*       | <0.05   |
|        |                  |                          | is        | +          | +          | 1.196               | 1.159  | 96.97   | all         | >0.05   |
|        |                  |                          | pe        | +          | +          | 0.236               | 0.029  | 12.30   | 20*         | <0.05   |
|        |                  |                          | cy        | +          | +          | 68.922              | 7.667  | 11.12   | 0/10*       | <0.001  |
|        |                  |                          | de        | -          | -          | 0.439               | 0.117  | 26.72   | 10*         | <0.01   |
|        |                  |                          | c         | -          | -          | n.d                 | n.d    | n.d     | n.d.        | n.d.    |
|        |                  |                          | e         | -          | -          | n.d                 | n.d    | n.d     | n.d.        |         |

For experimental procedures see methods, text, Fig. 2 and Fig. S6. "n.d." = not determined., "ta" = taxifolin, "ka" = kaempferol, "qu" = quercetin, "is" = isorhamnetin, "pe" = pelargonidin, "cy" = cyaniding, "de" = delphinidin, "c" = catechin, "e" = epicatechin, "pB2" = procyanidin B2. For LOD/LOQ see methods. Responses below LOQ were only used for plotting in Fig. S6 but not for drawing the decision. Note that the hydrolysis time for extracted non-hydrolysed samples only refers to the sample which was subsequently used for the respective extracted hydrolysed and non-extracted hydrolysed sample. These extracted non-hydrolysed samples were not hydrolysed. "\*" = for all other seed numbers:  $P > 0.05$ . Please note, this excludes seed numbers for which LOD is not passed. For all, significance was determined using the Welch test.
