# Supplementary material for: A fast and simple LC-MS-based characterization of the flavonoid biosynthesis pathway for few seed(ling)s
Source: PubMed Central journal article supplement (PMC5007998; doi:10.1186/s12870-016-0880-7), 2016-09-01
Supplement: 12870_2016_880_MOESM6_ESM.pdf [file 12870_2016_880_MOESM6_ESM.pdf]

## Additional\_file\_6

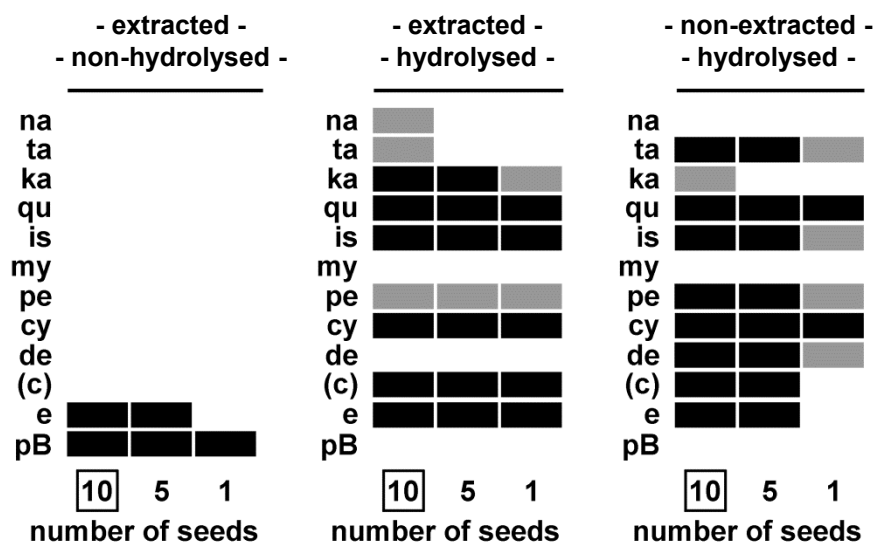

**Figure S9: Reduction of seed material down to one seed – repetition.** Flavonoids detected in the three seed samples, extracted non-hydrolysed, extracted hydrolysed, and non-extracted hydrolysed. Filled boxes represent that more than half of the replicates passed LOQ (black) or LOD (grey), respectively. Square box represent the seed number chosen.

ta: taxifolin, ka: kaempferol, qu: quercetin, is: isorhamnetin, my: myricetin, pe: pelargonidin, cy: cyanidin, de: delphinidin, c: catechin, e: epicatechin, pB: procyanidinB2.

Table S11. Data for Figure 4a,b

| Figure | No. of seeds | Sample type              | Substance | LOD passed | LOQ passed | Normalized response | STDEV | RSD [%] | Compared to  | P-value | Linearity (r <sup>2</sup> ) |                |
|--------|--------------|--------------------------|-----------|------------|------------|---------------------|-------|---------|--------------|---------|-----------------------------|----------------|
| 4a,b   | 50           | extracted non-hydrolysed | ta        | +          | +          | 0.017               | 0.004 | 22.67   | n.d.         | n.d.    | substance                   | r <sup>2</sup> |
|        |              |                          | e         | +          | +          | 0.077               | 0.028 | 35.85   | 5/10*        | <0.01   |                             |                |
|        |              |                          | pB        | +          | +          | 0.062               | 0.030 | 48.57   | 5/10*        | <0.05   |                             |                |
| 4a,b   | 25           | extracted non-hydrolysed | ta        | +          | -          | n.d.                | n.d.  | n.d.    | n.d.         | n.d.    | substance                   | r <sup>2</sup> |
|        |              |                          | e         | +          | +          | 0.059               | 0.033 | 56.97   | 5*           | <0.05   |                             |                |
|        |              |                          | pB        | +          | +          | 0.059               | 0.014 | 24.64   | 5/10*        | <0.01   |                             |                |
| 4a,b   | 10           | extracted non-hydrolysed | ta        | -          | -          | n.d.                | n.d.  | n.d.    | n.d.         | n.d.    | e                           | 0.89           |
|        |              |                          | e         | +          | +          | 0.020               | 0.005 | 25.65   | 50*          | <0.01   |                             |                |
|        |              |                          | pB        | +          | +          | 0.022               | 0.011 | 49.74   | 25/50*       | <0.05   |                             |                |
| 4a,b   | 5            | extracted non-hydrolysed | ta        | -          | -          | n.d.                | n.d.  | n.d.    | n.d.         | n.d.    | pB                          | 0.69           |
|        |              |                          | e         | +          | +          | 0.013               | 0.008 | 63.55   | 25/50*       | <0.05   |                             |                |
|        |              |                          | pB        | +          | +          | 0.012               | 0.011 | 91.24   | 25/50*       | <0.05   |                             |                |
| 4a,b   | 50           | extracted hydrolysed     | ta        | +          | +          | 0.049               | 0.008 | 16.73   | n.d.         | n.d.    | substance                   | r <sup>2</sup> |
|        |              |                          | ka        | +          | +          | 4.043               | 0.342 | 8.46    | 1/5/10*      | <0.001  |                             |                |
|        |              |                          | qu        | +          | +          | 20.119              | 1.316 | 6.54    | 1/5/10/25/50 | <0.001  |                             |                |
|        |              |                          | is        | +          | +          | 5.348               | 0.592 | 11.06   | 1/5/10/25    | <0.01   |                             |                |
|        |              |                          | pe        | +          | +          | 0.068               | 0.006 | 8.45    | n.d.         | n.d.    |                             |                |
|        |              |                          | cy        | +          | +          | 1.820               | 0.373 | 20.48   | 1/5/10*      | <0.001  |                             |                |
|        |              |                          | c         | +          | +          | 2.555               | 0.458 | 17.94   | 1/5/10/25    | <0.05   |                             |                |
| e      | +            | +                        | 0.602     | 0.093      | 15.36      | 1/5/10/25           | <0.05 |         |              |         |                             |                |
| 4a,b   | 25           | extracted hydrolysed     | ta        | +          | -          | n.d.                | n.d.  | n.d.    | n.d.         | n.d.    | qu                          | 0.97           |
|        |              |                          | ka        | +          | +          | 3.343               | 1.115 | 33.35   | 1/5/10*      | <0.01   |                             |                |
|        |              |                          | qu        | +          | +          | 13.086              | 0.950 | 7.26    | 1/5/10/25    | <0.001  |                             |                |
|        |              |                          | is        | +          | +          | 3.493               | 0.797 | 22.82   | 1/5/10/50    | <0.01   |                             |                |
|        |              |                          | pe        | +          | -          | n.d.                | n.d.  | n.d.    | n.d.         | n.d.    |                             |                |
|        |              |                          | cy        | +          | +          | 1.372               | 0.236 | 17.21   | 1/5/10*      | <0.001  |                             |                |
|        |              |                          | c         | +          | +          | 1.771               | 0.355 | 20.04   | 1/5/10/50    | <0.05   |                             |                |
| e      | +            | +                        | 0.432     | 0.099      | 23.01      | 1/5/10/50           | <0.05 |         |              |         |                             |                |
| 4a,b   | 10           | extracted hydrolysed     | ta        | +          | -          | n.d.                | n.d.  | n.d.    | n.d.         | n.d.    | c                           | 0.96           |
|        |              |                          | ka        | +          | +          | 1.094               | 0.787 | 71.96   | 1/25/50*     | <0.05   |                             |                |
|        |              |                          | qu        | +          | +          | 5.197               | 1.008 | 19.40   | 1/5/25/50    | <0.01   |                             |                |
|        |              |                          | is        | +          | +          | 1.115               | 0.484 | 43.43   | 1/5/25/50    | <0.05   | e                           | 0.94           |

Table S11. Data for Figure 4a,b

| Figure | No. of seeds | Sample type              | Substance | LOD passed | LOQ passed | Normalized response | STDEV  | RSD [%] | Compared to | P-value | Linearity (r <sup>2</sup> ) |
|--------|--------------|--------------------------|-----------|------------|------------|---------------------|--------|---------|-------------|---------|-----------------------------|
| 4a,b   | 10           | extracted hydrolysed     | pe        | +          | -          | n.d                 | n.d.   | n.d.    | n.d.        | n.d.    | n.d.                        |
|        |              |                          | cy        | +          | +          | 0.617               | 0.177  | 28.66   | 1/5/25/50   | <0.05   |                             |
|        |              |                          | c         | +          | +          | 0.784               | 0.220  | 28.06   | 1/5/25/50   | <0.05   |                             |
|        |              |                          | e         | +          | +          | 0.180               | 0.041  | 22.57   | 1/5/25/50   | <0.01   |                             |
| 4a,b   | 5            | extracted hydrolysed     | ta        | -          | -          | n.d                 | n.d    | n.d     | n.d.        | n.d.    |                             |
|        |              |                          | ka        | +          | +          | 0.383               | 0.064  | 16.78   | 1/25/50*    | <0.01   |                             |
|        |              |                          | qu        | +          | +          | 2.561               | 0.351  | 13.70   | 1/10/25/50  | <0.01   |                             |
|        |              |                          | is        | +          | +          | 0.461               | 0.073  | 15.74   | 1/10/25/50  | <0.05   |                             |
|        |              |                          | pe        | +          | -          | n.d                 | n.d.   | n.d.    | n.d.        | n.d.    |                             |
|        |              |                          | cy        | +          | +          | 0.334               | 0.142  | 42.64   | 10/25/50*   | <0.05   | see above                   |
|        |              |                          | c         | +          | +          | 0.429               | 0.201  | 46.80   | 1/10/25/50  | <0.05   |                             |
| e      | +            | +                        | 0.090     | 0.031      | 34.88      | 1/10/25/50          | <0.05  |         |             |         |                             |
| 4a,b   | 1            | extracted hydrolysed     | ta        | -          | -          | n.d                 | n.d    | n.d     | n.d.        | n.d.    |                             |
|        |              |                          | ka        | +          | +          | 0.089               | 0.038  | 43.26   | 5/10/25/50  | <0.05   |                             |
|        |              |                          | qu        | +          | +          | 0.588               | 0.262  | 44.63   | 5/10/25/50  | <0.001  |                             |
|        |              |                          | is        | +          | +          | 0.119               | 0.037  | 31.11   | 5/10/25/50  | <0.01   |                             |
|        |              |                          | pe        | +          | -          | n.d.                | n.d.   | n.d.    | n.d.        | n.d.    |                             |
|        |              |                          | cy        | +          | +          | 0.385               | 0.080  | 20.80   | 10/25/50*   | <0.05   |                             |
|        |              |                          | c         | +          | +          | 0.157               | 0.076  | 48.72   | 5/10/25/50  | <0.05   |                             |
| e      | +            | +                        | 0.037     | 0.018      | 50.40      | 5/10/25/50          | <0.05  |         |             |         |                             |
| 4a,b   | 50           | non-extracted hydrolysed | ta        | +          | +          | 1.010               | 0.051  | 5.06    | 10/25       | <0.001  | substance<br>r <sup>2</sup> |
|        |              |                          | ka        | +          | +          | 1.826               | 0.578  | 31.64   | 10/25       | <0.05   |                             |
|        |              |                          | qu        | +          | +          | 22.180              | 4.616  | 20.81   | 1/5/10/25   | <0.01   |                             |
|        |              |                          | is        | +          | +          | 2.906               | 0.790  | 27.18   | 1/5/10/25   | <0.01   |                             |
|        |              |                          | pe        | +          | +          | 0.723               | 0.088  | 12.18   | 10/25       | <0.001  |                             |
|        |              |                          | cy        | +          | +          | 84.660              | 3.849  | 4.55    | 10/25       | <0.001  |                             |
|        |              |                          | de        | +          | +          | 2.560               | 0.212  | 8.28    | 10/25       | <0.001  |                             |
|        |              |                          | c         | +          | +          | 29.120              | 4.705  | 16.16   | 5/10/25     | <0.001  |                             |
| e      | +            | +                        | 7.512     | 1.378      | 18.35      | 10/25               | <0.001 |         |             |         |                             |
| 4a,b   | 25           | non-extracted hydrolysed | ta        | +          | +          | 0.548               | 0.046  | 8.44    | 10/50       | <0.001  | pe 0.97                     |
|        |              |                          | ka        | +          | +          | 0.772               | 0.339  | 43.95   | 10/50       | <0.05   | cy 1.00                     |
|        |              |                          | qu        | +          | +          | 7.016               | 0.842  | 12.00   | 1/5/10/50   | <0.01   | de 0.97                     |
|        |              |                          | is        | +          | +          | 1.060               | 0.306  | 28.82   | 5/10/50     | <0.05   | c 1.00                      |
|        |              |                          | pe        | +          | +          | 0.336               | 0.039  | 11.72   | 10/50       | <0.001  | e 1.00                      |
|        |              |                          | cy        | +          | +          | 52.940              | 4.312  | 8.15    | 10/50       | <0.001  |                             |

**Table S11. Data for Figure 4a,b**

| Figure | No. of seeds | Sample type              | Substance | LOD passed | LOQ passed | Normalized response | STDEV | RSD [%] | Compared to | P-value | Linearity (r <sup>2</sup> ) |
|--------|--------------|--------------------------|-----------|------------|------------|---------------------|-------|---------|-------------|---------|-----------------------------|
| 4a,b   | 25           | non-extracted hydrolysed | de        | +          | +          | 0.971               | 0.222 | 22.82   | 10/50       | <0.01   |                             |
|        |              |                          | c         | +          | +          | 11.906              | 2.932 | 24.63   | 5/10/50     | <0.001  |                             |
|        |              |                          | e         | +          | +          | 3.086               | 0.950 | 30.79   | 10/50       | <0.01   |                             |
| 4a,b   | 10           | non-extracted hydrolysed | ta        | +          | +          | 0.255               | 0.030 | 11.90   | 25/50       | <0.001  |                             |
|        |              |                          | ka        | +          | +          | 0.347               | 0.113 | 32.47   | 25/50       | <0.05   |                             |
|        |              |                          | qu        | +          | +          | 3.656               | 1.268 | 34.68   | 1/5/25/50   | <0.05   |                             |
|        |              |                          | is        | +          | +          | 0.524               | 0.035 | 6.63    | 5/25/50*    | <0.05   |                             |
|        |              |                          | pe        | +          | +          | 0.194               | 0.029 | 15.16   | 25/50       | <0.001  |                             |
|        |              |                          | cy        | +          | +          | 35.760              | 3.009 | 8.41    | 25/50       | <0.001  |                             |
|        |              |                          | de        | +          | +          | 0.406               | 0.035 | 8.68    | 25/50       | <0.01   |                             |
|        |              |                          | c         | +          | +          | 3.100               | 2.932 | 94.60   | 5/25/50     | <0.05   |                             |
|        |              |                          | e         | +          | +          | 0.657               | 0.950 | 144.59  | 25/50       | <0.01   |                             |
| 4a,b   | 5            | non-extracted hydrolysed | ta        | +          | -          | n.d                 | n.d   | n.d     | n.d         | n.d     | see above                   |
|        |              |                          | ka        | +          | -          | n.d                 | n.d   | n.d     | n.d         | n.d     |                             |
|        |              |                          | qu        | +          | +          | 1.212               | 0.260 | 21.47   | 1/10/25/50  | <0.05   |                             |
|        |              |                          | is        | +          | +          | 0.323               | 0.102 | 31.43   | 10/25/50*   | <0.01   |                             |
|        |              |                          | pe        | +          | -          | n.d                 | n.d   | n.d     | n.d         | n.d     |                             |
|        |              |                          | cy        | +          | -          | n.d                 | n.d   | n.d     | n.d         | n.d     |                             |
|        |              |                          | de        | +          | -          | n.d                 | n.d   | n.d     | n.d         | n.d     |                             |
|        |              |                          | c         | +          | +          | 0.166               | 0.126 | 76.31   | 10/25/50    | <0.05   |                             |
|        |              |                          | e         | +          | -          | n.d                 | n.d   | n.d     | n.d         | n.d     |                             |
| 4a,b   | 1            | non-extracted hydrolysed | ta        | +          | -          | n.d                 | n.d   | n.d     | n.d         | n.d     |                             |
|        |              |                          | ka        | +          | -          | n.d                 | n.d   | n.d     | n.d         | n.d     |                             |
|        |              |                          | qu        | +          | +          | 0.288               | 0.179 | 62.08   | 5/10/25/50  | <0.01   |                             |
|        |              |                          | is        | +          | +          | 1.022               | 0.840 | 82.13   | 50*         | <0.01   |                             |
|        |              |                          | pe        | +          | -          | n.d                 | n.d   | n.d     | n.d         | n.d     |                             |
|        |              |                          | cy        | +          | -          | n.d                 | n.d   | n.d     | n.d         | n.d     |                             |
|        |              |                          | de        | +          | -          | n.d                 | n.d   | n.d     | n.d         | n.d     |                             |
|        |              |                          | c         | +          | -          | n.d                 | n.d   | n.d     | n.d         | n.d     |                             |
|        |              |                          | e         | +          | -          | n.d                 | n.d   | n.d     | n.d         | n.d     |                             |

For experimental procedures see methods, text and Fig. 4. Note that peak areas and statistics are only determined when LOQ was passed. Only substances are shown for which at least for one seed number LOQ was passed for a given sample type.

“n.d.” = not determined. “na” = naringenin, “ta” = taxifolin, “ka” = kaempferol, “qu” = quercetin, “is” = isorhamnetin, “my” = myricetin, “pe” = pelargonidin, “cy” = cyaniding, “de” = delphinidin, “c” = catechin, “e” = epicatechin, “pB” = procyanidin B2. For LOD/LOQ see methods. “Normalized response” = normalized to the respective internal standard. “\*” = for all other seed numbers:  $P > 0.05$ . Please note, this excludes seed numbers for which LOQ is not passed. For all, significance was determined using the Welch test.
