# Supplementary material for: A fast and simple LC-MS-based characterization of the flavonoid biosynthesis pathway for few seed(ling)s
Source: PubMed Central journal article supplement (PMC5007998; doi:10.1186/s12870-016-0880-7), 2016-09-01
Supplement: 12870_2016_880_MOESM7_ESM.pdf [file 12870_2016_880_MOESM7_ESM.pdf]

## Additional\_file\_7

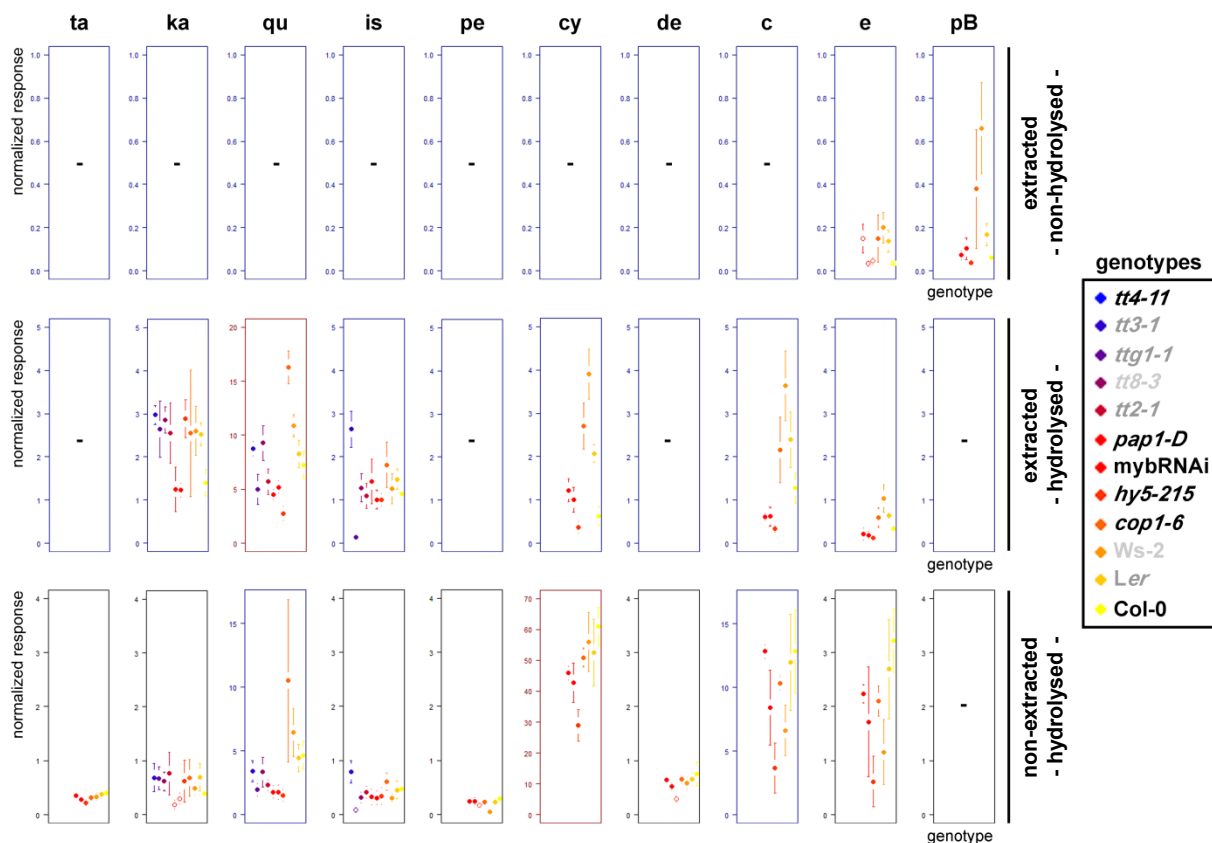

**Figure S10: Application (seeds of mutants) – normalized responses.** Plots showing the normalized response (normalized with the respective internal standard) of the different flavonoids tested in the different mutants. The three rows represent the 3 fraction extracted non-hydrolysed, extracted hydrolysed, non-extracted hydrolysed from top to bottom respectively. The different color of the outer rim of each plot correspond to the different scales used, the different colors of the dots represent the different mutants tested. -: In none of the lines, a quantifiable amount of this substance was detected in this samples type. Filled dots: LOQ is passed. Empty dots: LOD is passed, LOQ is not passed. Error bars = STDEV.

ta: taxifolin, ka: kaempferol, qu: quercetin, is: isorhamnetin, pe: pelargonidin, cy: cyanidin, de: delphinidin, c: catechin, e: epicatechin, pB: procyanidinB2.

**Table S12. Data for Figure 4c-e**

| Figure | Name                      | Sample type              | Substance | LOD passed | LOQ passed | Normalized to internal standard |       |         |                       | Normalized to kaempferol |       |         |                       |
|--------|---------------------------|--------------------------|-----------|------------|------------|---------------------------------|-------|---------|-----------------------|--------------------------|-------|---------|-----------------------|
|        |                           |                          |           |            |            | Normalized response             | STDEV | RSD [%] | Fold difference to wt | Normalized response      | STDEV | RSD [%] | Fold difference to wt |
| 4c,e   | <i>tt4-11</i><br>(Col-0)  | extracted non-hydrolysed | e         | -          | -          | n.d.                            | n.d.  | n.d.    | 0                     | n.d.                     | n.d.  | n.d.    | n.d.                  |
|        |                           |                          | pB        | -          | -          | n.d.                            | n.d.  | n.d.    | 0                     | n.d.                     | n.d.  | n.d.    | n.d.                  |
| 4d     | <i>tt7-1</i><br>(Ler)     | extracted non-hydrolysed | e         | -          | -          | n.d.                            | n.d.  | n.d.    | 0                     | n.d.                     | n.d.  | n.d.    | n.d.                  |
|        |                           |                          | pB        | -          | -          | n.d.                            | n.d.  | n.d.    | 0                     | n.d.                     | n.d.  | n.d.    | n.d.                  |
| 4c,e   | <i>tt3-1</i><br>(Ler)     | extracted non-hydrolysed | e         | -          | -          | n.d.                            | n.d.  | n.d.    | 0                     | n.d.                     | n.d.  | n.d.    | n.d.                  |
|        |                           |                          | pB        | -          | -          | n.d.                            | n.d.  | n.d.    | 0                     | n.d.                     | n.d.  | n.d.    | n.d.                  |
| 4c,e   | <i>ttg1-1</i><br>(Ler)    | extracted non-hydrolysed | e         | -          | -          | n.d.                            | n.d.  | n.d.    | 0                     | n.d.                     | n.d.  | n.d.    | n.d.                  |
|        |                           |                          | pB        | -          | -          | n.d.                            | n.d.  | n.d.    | 0                     | n.d.                     | n.d.  | n.d.    | n.d.                  |
| 4c,e   | <i>tt8-3</i><br>(Ws-2)    | extracted non-hydrolysed | e         | -          | -          | n.d.                            | n.d.  | n.d.    | 0                     | n.d.                     | n.d.  | n.d.    | n.d.                  |
|        |                           |                          | pB        | -          | -          | n.d.                            | n.d.  | n.d.    | 0                     | n.d.                     | n.d.  | n.d.    | n.d.                  |
| 4c,e   | <i>ttg2-1</i><br>(Ler)    | extracted non-hydrolysed | e         | -          | -          | n.d.                            | n.d.  | n.d.    | 0                     | n.d.                     | n.d.  | n.d.    | n.d.                  |
|        |                           |                          | pB        | -          | -          | n.d.                            | n.d.  | n.d.    | 0                     | n.d.                     | n.d.  | n.d.    | n.d.                  |
| 4c,e   | <i>pap1-D</i><br>(Col-0)  | extracted non-hydrolysed | e         | +          | -          | 0.150                           | 0.067 | 44.67   | 4.2                   | n.d.                     | n.d.  | n.d.    | n.d.                  |
|        |                           |                          | pB        | +          | +          | 0.073                           | 0.020 | 27.40   | 1.2                   | n.d.                     | n.d.  | n.d.    | n.d.                  |
| 4c,e   | <i>mybRNAi</i><br>(Col-0) | extracted non-hydrolysed | e         | +          | -          | 0.033                           | 0.014 | 42.42   | 0.9                   | n.d.                     | n.d.  | n.d.    | n.d.                  |
|        |                           |                          | pB        | +          | +          | 0.104                           | 0.050 | 48.08   | 1.7                   | n.d.                     | n.d.  | n.d.    | n.d.                  |
| 4c,e   | <i>hy5-215</i><br>(Col-0) | extracted non-hydrolysed | e         | +          | -          | 0.046                           | 0.017 | 36.96   | 1.3                   | n.d.                     | n.d.  | n.d.    | n.d.                  |
|        |                           |                          | pB        | +          | +          | 0.039                           | 0.011 | 28.21   | 0.6                   | n.d.                     | n.d.  | n.d.    | n.d.                  |



Table S12. Data for Figure 4c-e

| Figure | Name                     | Sample type             | Substance | LOD passed | LOQ passed | Normalized to internal standard |       |         |                       | Normalized to kaempferol |       |         |                       |
|--------|--------------------------|-------------------------|-----------|------------|------------|---------------------------------|-------|---------|-----------------------|--------------------------|-------|---------|-----------------------|
|        |                          |                         |           |            |            | Normalized response             | STDEV | RSD [%] | Fold difference to wt | Normalized response      | STDEV | RSD [%] | Fold difference to wt |
| 4c,e   | <i>tt3-1</i><br>(Ler)    | extracted<br>hydrolysed | cy        | -          | -          | n.d.                            | n.d.  | n.d.    | 0                     | n.d.                     | n.d.  | n.d.    | 0                     |
|        |                          |                         | c         | -          | -          | n.d.                            | n.d.  | n.d.    | 0                     | n.d.                     | n.d.  | n.d.    | 0                     |
|        |                          |                         | e         | -          | -          | n.d.                            | n.d.  | n.d.    | 0                     | n.d.                     | n.d.  | n.d.    | 0                     |
| 4c,e   | <i>ttg1-1</i><br>(Ler)   | extracted<br>hydrolysed | ka        | +          | +          | 2.641                           | 0.651 | 24.65   | 1.0                   | 1.000                    | 0.000 | 0.00    | 1.0                   |
|        |                          |                         | qu        | +          | +          | 4.992                           | 1.416 | 28.37   | 0.6                   | 1.895                    | 0.226 | 11.93   | 0.6                   |
|        |                          |                         | is        | +          | +          | 0.148                           | 0.037 | 25.00   | 0.1                   | 0.057                    | 0.008 | 14.04   | 0.1                   |
|        |                          |                         | pe        | -          | -          | n.d.                            | n.d.  | n.d.    | 0                     | n.d.                     | n.d.  | n.d.    | 0                     |
|        |                          |                         | cy        | -          | -          | n.d.                            | n.d.  | n.d.    | 0                     | n.d.                     | n.d.  | n.d.    | 0                     |
|        |                          |                         | c         | -          | -          | n.d.                            | n.d.  | n.d.    | 0                     | n.d.                     | n.d.  | n.d.    | n.d.                  |
| 4c,e   | <i>tt8-3</i><br>(Ws-2)   | extracted<br>hydrolysed | e         | -          | -          | n.d.                            | n.d.  | n.d.    | 0                     | n.d.                     | n.d.  | n.d.    | 0                     |
|        |                          |                         | ka        | +          | +          | 2.854                           | 0.306 | 10.72   | 1.1                   | 1.000                    | 0.000 | 0.00    | 1.0                   |
|        |                          |                         | qu        | +          | +          | 9.285                           | 1.612 | 17.36   | 0.9                   | 3.270                    | 0.417 | 12.75   | 0.8                   |
|        |                          |                         | is        | +          | +          | 1.285                           | 0.325 | 25.29   | 1.0                   | 0.450                    | 0.093 | 20.67   | 0.9                   |
|        |                          |                         | pe        | +          | -          | n.d.                            | n.d.  | n.d.    | 0                     | n.d.                     | n.d.  | n.d.    | 0                     |
|        |                          |                         | cy        | -          | -          | n.d.                            | n.d.  | n.d.    | 0                     | n.d.                     | n.d.  | n.d.    | 0                     |
| 4c,e   | <i>ttg2-1</i><br>(Ler)   | extracted<br>hydrolysed | c         | -          | -          | n.d.                            | n.d.  | n.d.    | 0                     | n.d.                     | n.d.  | n.d.    | 0                     |
|        |                          |                         | e         | -          | -          | n.d.                            | n.d.  | n.d.    | 0                     | n.d.                     | n.d.  | n.d.    | 0                     |
|        |                          |                         | ka        | +          | +          | 2.554                           | 0.704 | 27.56   | 1.0                   | 1.000                    | 0.000 | 0.00    | 0.3                   |
|        |                          |                         | qu        | +          | +          | 5.704                           | 1.173 | 20.56   | 0.7                   | 2.297                    | 0.542 | 23.60   | 0.7                   |
|        |                          |                         | is        | +          | +          | 1.098                           | 0.291 | 26.50   | 0.7                   | 0.440                    | 0.099 | 22.50   | 0.1                   |
|        |                          |                         | pe        | -          | -          | n.d.                            | n.d.  | n.d.    | 0                     | n.d.                     | n.d.  | n.d.    | 0                     |
| 4c,e   | <i>pap1-D</i><br>(Col-0) | extracted<br>hydrolysed | cy        | +          | +          | 1.221                           | 0.268 | 21.95   | 1.9                   | 1.049                    | 0.566 | 53.96   | 2.3                   |
|        |                          |                         | c         | +          | +          | 0.609                           | 0.076 | 12.48   | 0.5                   | 0.531                    | 0.619 | 116.57  | 0.6                   |
|        |                          |                         | e         | +          | +          | 0.214                           | 0.138 | 64.49   | 0.6                   | 0.160                    | 0.135 | 84.38   | 0.6                   |
|        |                          |                         | is        | +          | +          | 1.431                           | 0.516 | 36.06   | 1.2                   | 1.177                    | 0.152 | 12.91   | 1.4                   |
|        |                          |                         | qu        | +          | +          | 4.509                           | 0.492 | 10.91   | 0.6                   | 3.953                    | 2.782 | 70.38   | 0.7                   |
|        |                          |                         | ka        | +          | +          | 1.253                           | 0.514 | 41.02   | 0.9                   | 1.000                    | 0.000 | 0.00    | 1.0                   |

Table S12. Data for Figure 4c-e

| Figure | Name                      | Sample type             | Substance | LOD passed | LOQ passed | Normalized to internal standard |       |         |                       | Normalized to kaempferol |       |         |                       |
|--------|---------------------------|-------------------------|-----------|------------|------------|---------------------------------|-------|---------|-----------------------|--------------------------|-------|---------|-----------------------|
|        |                           |                         |           |            |            | Normalized response             | STDEV | RSD [%] | Fold difference to wt | Normalized response      | STDEV | RSD [%] | Fold difference to wt |
| 4c,e   | <i>mybRNAi</i><br>(Col-0) | extracted<br>hydrolysed | ka        | +          | +          | 1.230                           | 0.160 | 13.01   | 0.9                   | 1.000                    | 0.000 | 0.00    | 1.0                   |
|        |                           |                         | qu        | +          | +          | 5.202                           | 0.552 | 10.61   | 0.7                   | 4.303                    | 0.253 | 5.88    | 0.8                   |
|        |                           |                         | is        | +          | +          | 1.011                           | 0.220 | 21.76   | 0.9                   | 0.829                    | 0.024 | 2.90    | 1.0                   |
|        |                           |                         | pe        | +          | -          | n.d.                            | n.d.  | n.d.    | 0                     | n.d.                     | n.d.  | n.d.    | 0                     |
|        |                           |                         | cy        | +          | +          | 1.004                           | 0.294 | 29.28   | 1.6                   | 0.838                    | 0.037 | 4.42    | 1.8                   |
|        |                           |                         | c         | +          | +          | 0.619                           | 0.225 | 36.35   | 0.5                   | 0.498                    | 0.026 | 5.22    | 0.5                   |
|        |                           |                         | e         | +          | +          | 0.191                           | 0.086 | 45.03   | 0.6                   | 0.153                    | 0.015 | 9.80    | 0.6                   |
| 4c,e   | <i>hy5-215</i><br>(Col-0) | extracted<br>hydrolysed | ka        | +          | +          | 2.887                           | 0.434 | 15.03   | 2.1                   | 1.000                    | 0.000 | 0.00    | 1.0                   |
|        |                           |                         | qu        | +          | +          | 2.751                           | 0.637 | 23.16   | 0.4                   | 0.970                    | 0.862 | 88.87   | 0.2                   |
|        |                           |                         | is        | +          | +          | 1.012                           | 0.135 | 13.34   | 0.9                   | 0.352                    | 0.204 | 57.95   | 0.4                   |
|        |                           |                         | pe        | +          | -          | n.d.                            | n.d.  | n.d.    | 0                     | n.d.                     | n.d.  | n.d.    | 0                     |
|        |                           |                         | cy        | +          | +          | 0.371                           | 0.133 | 35.85   | 0.6                   | 0.127                    | 0.316 | 248.82  | 0.3                   |
|        |                           |                         | c         | +          | +          | 0.332                           | 0.067 | 20.18   | 0.3                   | 0.117                    | 0.135 | 115.38  | 0.1                   |
|        |                           |                         | e         | +          | +          | 0.126                           | 0.037 | 29.37   | 0.4                   | 0.045                    | 0.056 | 124.44  | 0.2                   |
| 4c,e   | <i>cop1-6</i><br>(Col-0)  | extracted<br>hydrolysed | ka        | +          | +          | 2.549                           | 1.467 | 57.55   | 1.8                   | 1.000                    | 0.000 | 0.00    | 1.0                   |
|        |                           |                         | qu        | +          | +          | 16.272                          | 1.506 | 9.26    | 2.3                   | 7.590                    | 1.125 | 14.82   | 1.4                   |
|        |                           |                         | is        | +          | +          | 1.817                           | 0.517 | 28.45   | 1.6                   | 0.779                    | 0.294 | 37.74   | 0.9                   |
|        |                           |                         | pe        | +          | -          | n.d.                            | n.d.  | n.d.    | 0                     | n.d.                     | n.d.  | n.d.    | 0                     |
|        |                           |                         | cy        | +          | +          | 2.708                           | 0.534 | 19.72   | 4.3                   | 1.270                    | 0.281 | 22.13   | 2.8                   |
|        |                           |                         | c         | +          | +          | 2.156                           | 0.755 | 35.02   | 1.7                   | 1.023                    | 0.163 | 15.93   | 1.1                   |
|        |                           |                         | e         | +          | +          | 0.601                           | 0.226 | 37.60   | 1.8                   | 0.267                    | 0.043 | 16.10   | 1.1                   |
| 4c,e   | Col-0                     | extracted<br>hydrolysed | ka        | +          | +          | 1.400                           | 0.297 | 21.21   | 1                     | 1.000                    | 0     | 0.00    | 1                     |
|        |                           |                         | qu        | +          | +          | 7.227                           | 1.264 | 17.49   | 1                     | 5.387                    | 1.480 | 27.47   | 1                     |
|        |                           |                         | is        | +          | +          | 1.146                           | 0.145 | 12.65   | 1                     | 0.839                    | 0.152 | 18.12   | 1                     |
|        |                           |                         | pe        | +          | -          | n.d.                            | n.d.  | n.d.    | 1                     | n.d.                     | n.d.  | n.d.    | 1                     |
|        |                           |                         | cy        | +          | +          | 0.631                           | 0.219 | 34.71   | 1                     | 0.461                    | 0.178 | 38.61   | 1                     |
|        |                           |                         | c         | +          | +          | 1.283                           | 0.348 | 27.12   | 1                     | 0.916                    | 0.130 | 14.19   | 1                     |
|        |                           |                         | e         | +          | +          | 0.332                           | 0.062 | 18.67   | 1                     | 0.248                    | 0.088 | 35.48   | 1                     |
| 4c-e   | Ler                       | extracted<br>hydrolysed | ka        | +          | +          | 2.529                           | 0.267 | 10.56   | 1                     | 1.000                    | 0.000 | 0.00    | 1                     |
|        |                           |                         | qu        | +          | +          | 8.269                           | 1.250 | 15.12   | 1                     | 3.279                    | 0.416 | 12.69   | 1                     |
|        |                           |                         | is        | +          | +          | 1.483                           | 0.239 | 16.12   | 1                     | 0.587                    | 0.070 | 11.93   | 1                     |
|        |                           |                         | pe        | +          | -          | 0.044                           | 0.011 | 25.00   | 1                     | 0.017                    | 0.004 | 23.53   | 1                     |
|        |                           |                         | cy        | +          | +          | 2.073                           | 0.205 | 9.89    | 1                     | 0.825                    | 0.097 | 11.76   | 1                     |

Table S12. Data for Figure 4c-e

| Figure | Name           | Sample type              | Substance | Normalized to internal standard |            |                     |       |         |                       | Normalized to kaempferol |       |         |                       |      |
|--------|----------------|--------------------------|-----------|---------------------------------|------------|---------------------|-------|---------|-----------------------|--------------------------|-------|---------|-----------------------|------|
|        |                |                          |           | LOD passed                      | LOQ passed | Normalized response | STDEV | RSD [%] | Fold difference to wt | Normalized response      | STDEV | RSD [%] | Fold difference to wt |      |
| 4c-e   | Ler            | extracted hydrolysed     | c         | +                               | +          | 2.398               | 0.642 | 26.77   | 1                     | 0.954                    | 0.246 | 25.79   | 1                     |      |
|        |                |                          | e         | +                               | +          | 0.644               | 0.061 | 9.47    | 1                     | 0.258                    | 0.044 | 17.05   | 1                     |      |
| 4c,e   | Ws-2           | extracted hydrolysed     | ka        | +                               | +          | 2.604               | 0.570 | 21.89   | 1                     | 1.000                    | 0.000 | 0.00    | 1                     |      |
|        |                |                          | qu        | +                               | +          | 10.876              | 1.042 | 9.58    | 1                     | 4.262                    | 0.494 | 11.59   | 1                     |      |
|        |                |                          | is        | +                               | +          | 1.268               | 0.351 | 27.68   | 1                     | 0.487                    | 0.080 | 16.43   | 1                     |      |
|        |                |                          | pe        | +                               | -          | n.d.                | n.d.  | n.d.    | 1                     | n.d.                     | n.d.  | n.d.    | 1                     |      |
|        |                |                          | cy        | +                               | +          | 3.903               | 0.581 | 14.89   | 1                     | 1.534                    | 0.307 | 20.01   | 1                     |      |
|        |                |                          | c         | +                               | +          | 3.640               | 0.803 | 22.06   | 1                     | 1.417                    | 0.263 | 18.56   | 1                     |      |
|        |                |                          | e         | +                               | +          | 1.038               | 0.319 | 30.73   | 1                     | 0.397                    | 0.064 | 16.12   | 1                     |      |
| 4c,e   | tt4-11 (Col-0) | non-extracted hydrolysed | ta        | -                               | -          | n.d.                | n.d.  | n.d.    | 0                     | n.d.                     | n.d.  | n.d.    | 0                     |      |
|        |                |                          | ka        | -                               | -          | n.d.                | n.d.  | n.d.    | 0                     | n.d.                     | n.d.  | n.d.    | 0                     |      |
|        |                |                          | qu        | -                               | -          | n.d.                | n.d.  | n.d.    | 0                     | n.d.                     | n.d.  | n.d.    | 0                     |      |
|        |                |                          | is        | -                               | -          | n.d.                | n.d.  | n.d.    | 0                     | n.d.                     | n.d.  | n.d.    | 0                     |      |
|        |                |                          | pe        | -                               | -          | n.d.                | n.d.  | n.d.    | 0                     | n.d.                     | n.d.  | n.d.    | 0                     |      |
|        |                |                          | cy        | -                               | -          | n.d.                | n.d.  | n.d.    | 0                     | n.d.                     | n.d.  | n.d.    | 0                     |      |
|        |                |                          | de        | -                               | -          | n.d.                | n.d.  | n.d.    | 0                     | n.d.                     | n.d.  | n.d.    | 0                     |      |
|        |                |                          | c         | -                               | -          | n.d.                | n.d.  | n.d.    | 0                     | n.d.                     | n.d.  | n.d.    | 0                     |      |
| e      | -              | -                        | n.d.      | n.d.                            | n.d.       | 0                   | n.d.  | n.d.    | n.d.                  | 0                        |       |         |                       |      |
| 4d     | tt7-1 (Ler)    | non-extracted hydrolysed | ta        | -                               | -          | n.d.                | n.d.  | n.d.    | 0                     | n.d.                     | n.d.  | n.d.    | 0                     |      |
|        |                |                          | ka        | +                               | +          | 12.822              | 3.273 | 25.53   | 18.5                  | 1.000                    | 0.000 | 0.00    | 1                     |      |
|        |                |                          | qu        | -                               | -          | n.d.                | n.d.  | n.d.    | 0                     | n.d.                     | n.d.  | n.d.    | 0                     |      |
|        |                |                          | is        | -                               | -          | n.d.                | n.d.  | n.d.    | 0                     | n.d.                     | n.d.  | n.d.    | 0                     |      |
|        |                |                          | pe        | +                               | +          | 27.498              | 3.122 | 11.35   | 115.9                 | 2.268                    | 0.707 | 31.17   | 6.2                   |      |
|        |                |                          | cy        | +                               | +          | n.d.                | n.d.  | n.d.    | n.d.                  | n.d.                     | n.d.  | n.d.    | n.d.                  | n.d. |
|        |                |                          | de        | -                               | -          | n.d.                | n.d.  | n.d.    | 0                     | n.d.                     | n.d.  | n.d.    | 0                     |      |
| c      | -              | -                        | n.d.      | n.d.                            | n.d.       | 0                   | n.d.  | n.d.    | n.d.                  | 0                        |       |         |                       |      |
| e      | -              | -                        | n.d.      | n.d.                            | n.d.       | 0                   | n.d.  | n.d.    | n.d.                  | 0                        |       |         |                       |      |
| 4c,e   | tt3-1 (Ler)    | non-extracted hydrolysed | ta        | -                               | -          | n.d.                | n.d.  | n.d.    | 0                     | n.d.                     | n.d.  | n.d.    | 0                     |      |
|        |                |                          | ka        | +                               | +          | 0.689               | 0.266 | 38.61   | 1.0                   | 1.000                    | 0.000 | 0.00    | 1,0                   |      |
|        |                |                          | qu        | +                               | +          | 3.409               | 0.813 | 23.85   | 0.8                   | 5.164                    | 1.007 | 19.50   | 0,8                   |      |
|        |                |                          | is        | +                               | +          | 0.796               | 0.207 | 26.05   | 1.7                   | 1.206                    | 0.271 | 22.47   | 1,8                   |      |
|        |                |                          | pe        | -                               | -          | n.d.                | n.d.  | n.d.    | 0                     | n.d.                     | n.d.  | n.d.    | 0                     |      |
|        |                |                          | cy        | -                               | -          | n.d.                | n.d.  | n.d.    | 0                     | n.d.                     | n.d.  | n.d.    | 0                     |      |
| de     | -              | -                        | n.d.      | n.d.                            | n.d.       | 0                   | n.d.  | n.d.    | n.d.                  | 0                        |       |         |                       |      |

Table S12. Data for Figure 4c-e

| Figure | Name                     | Sample type                 | Substance | Normalized to internal standard |            |                     |        |         |                       | Normalized to kaempferol |       |         |                       |
|--------|--------------------------|-----------------------------|-----------|---------------------------------|------------|---------------------|--------|---------|-----------------------|--------------------------|-------|---------|-----------------------|
|        |                          |                             |           | LOD passed                      | LOQ passed | Normalized response | STDEV  | RSD [%] | Fold difference to wt | Normalized response      | STDEV | RSD [%] | Fold difference to wt |
| 4c,e   | <i>tt3-1</i><br>(Ler)    | non-extracted<br>hydrolysed | c         | -                               | -          | n.d.                | n.d.   | n.d.    | 0                     | n.d.                     | n.d.  | n.d.    | 0                     |
|        |                          |                             | e         | -                               | -          | n.d.                | n.d.   | n.d.    | 0                     | n.d.                     | n.d.  | n.d.    | 0                     |
| 4c,e   | <i>ttg1-1</i><br>(Ler)   | non-extracted<br>hydrolysed | ka        | +                               | +          | 0.677               | 0.213  | 31.38   | 1.0                   | 1.000                    | 0.000 | 0.00    | 1,0                   |
|        |                          |                             | qu        | +                               | +          | 1.966               | 0.494  | 25.14   | 0.4                   | 3.026                    | 0.857 | 28.32   | 0,4                   |
|        |                          |                             | is        | +                               | -          | 0.084               | 0.049  | 58.61   | 0.2                   | 0.124                    | 0.065 | 52.70   | 0,2                   |
|        |                          |                             | pe        | -                               | -          | n.d.                | n.d.   | n.d.    | 0                     | n.d.                     | n.d.  | n.d.    | 0                     |
|        |                          |                             | cy        | -                               | -          | n.d.                | n.d.   | n.d.    | 0                     | n.d.                     | n.d.  | n.d.    | 0                     |
|        |                          |                             | c         | -                               | -          | n.d.                | n.d.   | n.d.    | 0                     | n.d.                     | n.d.  | n.d.    | 0                     |
|        |                          |                             | e         | -                               | -          | n.d.                | n.d.   | n.d.    | 0                     | n.d.                     | n.d.  | n.d.    | 0                     |
| 4c,e   | <i>tt8-3</i><br>(Ws-2)   | non-extracted<br>hydrolysed | ta        | -                               | -          | n.d.                | n.d.   | n.d.    | 0                     | n.d.                     | n.d.  | n.d.    | 0                     |
|        |                          |                             | ka        | +                               | +          | 0.617               | 0.179  | 28.94   | 1.3                   | 1.000                    | 0.000 | 0.00    | 1,0                   |
|        |                          |                             | qu        | +                               | +          | 3.346               | 1.156  | 34.54   | 0.5                   | 3.510                    | 1.255 | 35.75   | 0,3                   |
|        |                          |                             | is        | +                               | +          | 0.324               | 0.098  | 30.28   | 1.1                   | 0.599                    | 0.130 | 21.70   | 0,9                   |
|        |                          |                             | pe        | -                               | -          | n.d.                | n.d.   | n.d.    | 0                     | n.d.                     | n.d.  | n.d.    | 0                     |
|        |                          |                             | cy        | -                               | -          | n.d.                | n.d.   | n.d.    | 0                     | n.d.                     | n.d.  | n.d.    | 0                     |
|        |                          |                             | de        | -                               | -          | n.d.                | n.d.   | n.d.    | 0                     | n.d.                     | n.d.  | n.d.    | 0                     |
| 4c,e   | <i>ttg2-1</i><br>(Ler)   | non-extracted<br>hydrolysed | c         | -                               | -          | n.d.                | n.d.   | n.d.    | 0                     | n.d.                     | n.d.  | n.d.    | 0                     |
|        |                          |                             | e         | -                               | -          | n.d.                | n.d.   | n.d.    | 0                     | n.d.                     | n.d.  | n.d.    | 0                     |
|        |                          |                             | ta        | -                               | -          | n.d.                | n.d.   | n.d.    | 0                     | n.d.                     | n.d.  | n.d.    | 0                     |
|        |                          |                             | ka        | +                               | +          | 0.763               | 0.398  | 52.24   | 1.1                   | 1.000                    | 0.000 | 0.00    | 1,0                   |
|        |                          |                             | qu        | +                               | +          | 2.320               | 0.438  | 18.89   | 0.5                   | 5.519                    | 1.321 | 23.94   | 0,8                   |
|        |                          |                             | is        | +                               | +          | 0.419               | 0.109  | 26.05   | 0.9                   | 0.557                    | 0.256 | 45.96   | 0,8                   |
|        |                          |                             | pe        | -                               | -          | n.d.                | n.d.   | n.d.    | 0                     | n.d.                     | n.d.  | n.d.    | 0                     |
| 4c,e   | <i>pap1-D</i><br>(Col-0) | non-extracted<br>hydrolysed | cy        | -                               | -          | n.d.                | n.d.   | n.d.    | 0                     | n.d.                     | n.d.  | n.d.    | 0                     |
|        |                          |                             | de        | -                               | -          | n.d.                | n.d.   | n.d.    | 0                     | n.d.                     | n.d.  | n.d.    | 0                     |
|        |                          |                             | ta        | +                               | +          | 0.350               | 0.029  | 8.16    | 0.9                   | 0.559                    | 0.287 | 51.34   | 0,5                   |
|        |                          |                             | ka        | +                               | -          | 0.185               | 0.082  | 44.20   | 0.5                   | 1.000                    | 0.000 | 0.00    | 1,0                   |
|        |                          |                             | qu        | +                               | +          | 1.790               | 0.504  | 28.13   | 0.4                   | 14.914                   | 2.743 | 18.39   | 1,2                   |
|        |                          |                             | is        | +                               | +          | 0.334               | 0.143  | 42.92   | 0.7                   | 0.988                    | 0.233 | 23.58   | 0,8                   |
|        |                          |                             | pe        | +                               | +          | 0.252               | 0.021  | 8.42    | 0.8                   | 0.409                    | 0.171 | 41.81   | 0,5                   |
| cy     | +                        | +                           | 45.852    | 2.268                           | 4.95       | 0.8                 | 90.868 | 44.150  | 48.59                 | 0,6                      |       |         |                       |
| de     | +                        | +                           | 0.651     | 0.028                           | 4.24       | 0.9                 | 1.165  | 0.607   | 52.10                 | 0,6                      |       |         |                       |

Table S12. Data for Figure 4c-e

| Figure | Name                      | Sample type                 | Substance | LOD passed | LOQ passed | Normalized to internal standard |       |         |                       | Normalized to kaempferol |        |         |                       |
|--------|---------------------------|-----------------------------|-----------|------------|------------|---------------------------------|-------|---------|-----------------------|--------------------------|--------|---------|-----------------------|
|        |                           |                             |           |            |            | Normalized response             | STDEV | RSD [%] | Fold difference to wt | Normalized response      | STDEV  | RSD [%] | Fold difference to wt |
| 4c,e   | <i>pap1-D</i><br>(Col-0)  | non-extracted<br>hydrolysed | c         | +          | +          | 12.837                          | 0.524 | 4.08    | 1.0                   | 18.343                   | 9.105  | 49.64   | 0,6                   |
|        |                           |                             | e         | +          | +          | 2.238                           | 0.174 | 7.76    | 0.7                   | 3.623                    | 1.411  | 38.95   | 0,4                   |
| 4c,e   | <i>mybRNAi</i><br>(Col-0) | non-extracted<br>hydrolysed | ta        | +          | +          | 0.285                           | 0.040 | 14.02   | 0.7                   | 0.451                    | 0.279  | 61.86   | 0,4                   |
|        |                           |                             | ka        | +          | -          | 0.299                           | 0.105 | 35.24   | 0.8                   | 1.000                    | 0.000  | 0.00    | 1,0                   |
|        |                           |                             | qu        | +          | +          | 1.781                           | 0.557 | 31.25   | 0.4                   | 2.893                    | 1.435  | 49.60   | 0,2                   |
|        |                           |                             | is        | +          | +          | 0.311                           | 0.124 | 40.02   | 0.7                   | 0.595                    | 0.119  | 20.00   | 0,5                   |
|        |                           |                             | pe        | +          | +          | 0.250                           | 0.066 | 26.46   | 0.8                   | 0.872                    | 0.199  | 22.83   | 1,1                   |
|        |                           |                             | cy        | +          | +          | 42.790                          | 6.397 | 14.95   | 0.7                   | 59.077                   | 34.604 | 58.57   | 0,4                   |
|        |                           |                             | de        | +          | +          | 0.524                           | 0.063 | 12.07   | 0.7                   | 1.911                    | 0.635  | 33.22   | 1,0                   |
|        |                           |                             | c         | +          | +          | 8.446                           | 2.938 | 34.79   | 0.7                   | 7.118                    | 5.453  | 76.61   | 0,2                   |
| 4c,e   | <i>hy5-215</i><br>(Col-0) | non-extracted<br>hydrolysed | e         | +          | +          | 1.717                           | 1.013 | 58.99   | 0.5                   | 1.076                    | 0.849  | 78.90   | 0,1                   |
|        |                           |                             | ta        | +          | +          | 0.218                           | 0.040 | 18.27   | 0.5                   | 0.451                    | 0.279  | 61.92   | 0,4                   |
|        |                           |                             | ka        | +          | +          | 0.624                           | 0.390 | 62.47   | 1.6                   | 1.000                    | 0.000  | 0.00    | 1,0                   |
|        |                           |                             | qu        | +          | +          | 1.511                           | 0.450 | 29.80   | 0.3                   | 2.893                    | 1.435  | 49.60   | 0,2                   |
|        |                           |                             | is        | +          | +          | 0.344                           | 0.155 | 44.91   | 0.7                   | 0.595                    | 0.119  | 20.03   | 0,5                   |
|        |                           |                             | pe        | +          | -          | 0.170                           | 0.038 | 22.21   | 0.6                   | 0.360                    | 0.221  | 61.34   | 0,4                   |
|        |                           |                             | cy        | +          | +          | 28.990                          | 5.106 | 17.61   | 0.5                   | 59.077                   | 34.604 | 58.57   | 0,4                   |
|        |                           |                             | de        | +          | -          | 0.293                           | 0.064 | 21.79   | 0.4                   | 0.626                    | 0.433  | 69.21   | 0,3                   |
| 4c,e   | <i>cop1-6</i><br>(Col-0)  | non-extracted<br>hydrolysed | c         | +          | +          | 3.700                           | 1.958 | 52.91   | 0.3                   | 7.118                    | 5.453  | 76.62   | 0,2                   |
|        |                           |                             | e         | +          | +          | 0.617                           | 0.472 | 76.58   | 0.2                   | 1.076                    | 0.849  | 78.83   | 0,1                   |
|        |                           |                             | ta        | +          | +          | 0.317                           | 0.042 | 13.25   | 0.8                   | 0.559                    | 0.287  | 51.40   | 0,5                   |
|        |                           |                             | ka        | +          | +          | 0.682                           | 0.337 | 49.40   | 1.8                   | 1.000                    | 0.000  | 0.00    | 1,0                   |
|        |                           |                             | qu        | +          | +          | 10.529                          | 6.369 | 60.49   | 2.3                   | 14.914                   | 2.743  | 18.39   | 1,2                   |
|        |                           |                             | is        | +          | +          | 0.613                           | 0.159 | 25.89   | 1.3                   | 0.988                    | 0.233  | 23.62   | 0,8                   |
|        |                           |                             | pe        | +          | +          | 0.235                           | 0.030 | 12.55   | 0.8                   | 0.409                    | 0.171  | 41.88   | 0,5                   |
|        |                           |                             | cy        | +          | +          | 50.911                          | 3.040 | 5.97    | 0.8                   | 90.868                   | 44.150 | 48.59   | 0,6                   |
| 4c,e   | Col-0                     | non-extracted<br>hydrolysed | de        | +          | +          | 0.657                           | 0.066 | 10.05   | 0.9                   | 1.165                    | 0.607  | 52.12   | 0,6                   |
|        |                           |                             | c         | +          | +          | 10.311                          | 0.510 | 4.94    | 0.8                   | 18.343                   | 9.105  | 49.64   | 0,5                   |
|        |                           |                             | e         | +          | +          | 2.102                           | 0.282 | 13.42   | 0.7                   | 3.623                    | 1.411  | 38.95   | 0,4                   |
|        |                           |                             | ta        | +          | +          | 0.401                           | 0.053 | 13.23   | 1                     | 1.074                    | 0.254  | 23.65   | 1                     |
|        |                           |                             | ka        | +          | +          | 0.390                           | 0.091 | 23.41   | 1                     | 1.000                    | 0.000  | 0.00    | 1                     |
|        |                           |                             | qu        | +          | +          | 4.675                           | 1.125 | 24.07   | 1                     | 12.177                   | 2.027  | 16.65   | 1                     |
|        |                           |                             | is        | +          | +          | 0.472                           | 0.027 | 5.74    | 1                     | 1.274                    | 0.333  | 26.14   | 1                     |
|        |                           |                             | pe        | +          | +          | 0.297                           | 0.048 | 16.33   | 1                     | 0.805                    | 0.269  | 33.42   | 1                     |



**Table S12. Data for Figure 4c-e**

| Figure | Name  | Sample type              | Substance | Normalized to internal standard |            |                     |        |         | Normalized to kaempferol |                     |        |         |                       |
|--------|-------|--------------------------|-----------|---------------------------------|------------|---------------------|--------|---------|--------------------------|---------------------|--------|---------|-----------------------|
|        |       |                          |           | LOD passed                      | LOQ passed | Normalized response | STDEV  | RSD [%] | Fold difference to wt    | Normalized response | STDEV  | RSD [%] | Fold difference to wt |
| 4c,e   | Col-0 | non-extracted hydrolysed | cy        | +                               | +          | 61.057              | 6.141  | 10.06   | 1                        | 163.953             | 39.548 | 24.12   | 1                     |
|        |       |                          | de        | +                               | +          | 0.757               | 0.220  | 29.12   | 1                        | 1.987               | 0.496  | 24.96   | 1                     |
|        |       |                          | c         | +                               | +          | 12.838              | 3.281  | 25.55   | 1                        | 33.486              | 6.427  | 19.19   | 1                     |
|        |       |                          | e         | +                               | +          | 3.218               | 0.578  | 17.97   | 1                        | 8.593               | 2.192  | 25.51   | 1                     |
| 4c-e   | Ler   | non-extracted hydrolysed | ta        | +                               | +          | 0.375               | 0.077  | 20.58   | 1                        | 0.581               | 0.156  | 26.85   | 1                     |
|        |       |                          | ka        | +                               | +          | 0.695               | 0.255  | 36.64   | 1                        | 1.000               | 0.000  | 0.00    | 1                     |
|        |       |                          | qu        | +                               | +          | 4.460               | 1.084  | 24.30   | 1                        | 6.916               | 2.283  | 33.01   | 1                     |
|        |       |                          | is        | +                               | +          | 0.456               | 0.166  | 36.36   | 1                        | 0.661               | 0.133  | 20.12   | 1                     |
|        |       |                          | pe        | +                               | +          | 0.237               | 0.054  | 22.87   | 1                        | 0.364               | 0.089  | 24.45   | 1                     |
|        |       |                          | cy        | +                               | +          | 52.486              | 10.856 | 20.68   | 1                        | 79.717              | 16.006 | 20.08   | 1                     |
|        |       |                          | de        | +                               | +          | 0.659               | 0.125  | 18.95   | 1                        | 1.014               | 0.246  | 24.26   | 1                     |
|        |       |                          | c         | +                               | +          | 11.984              | 3.766  | 31.42   | 1                        | 17.607              | 2.634  | 14.96   | 1                     |
| 4c,e   | Ws-2  | non-extracted hydrolysed | e         | +                               | +          | 2.694               | 0.914  | 33.92   | 1                        | 3.946               | 0.655  | 16.60   | 1                     |
|        |       |                          | ta        | +                               | +          | 0.333               | 0.068  | 20.28   | 1                        | 0.716               | 0.231  | 32.26   | 1                     |
|        |       |                          | ka        | +                               | +          | 0.489               | 0.107  | 21.97   | 1                        | 1.000               | 0.000  | 0.00    | 1                     |
|        |       |                          | qu        | +                               | +          | 6.439               | 1.879  | 29.18   | 1                        | 13.397              | 3.317  | 24.76   | 1                     |
|        |       |                          | is        | +                               | +          | 0.307               | 0.072  | 23.53   | 1                        | 0.647               | 0.153  | 23.65   | 1                     |
|        |       |                          | pe        | +                               | +          | 0.051               | 0.012  | 24.04   | 1                        | 0.107               | 0.024  | 22.43   | 1                     |
|        |       |                          | cy        | +                               | +          | 55.966              | 9.586  | 17.13   | 1                        | 119.926             | 36.067 | 30.07   | 1                     |
|        |       |                          | de        | +                               | +          | 0.583               | 0.110  | 18.82   | 1                        | 1.230               | 0.298  | 24.23   | 1                     |
| c      | +     | +                        | 6.630     | 1.992                           | 30.04      | 1                   | 14.407 | 5.967   | 41.42                    | 1                   |        |         |                       |
| e      | +     | +                        | 1.162     | 0.604                           | 52.01      | 1                   | 2.548  | 1.439   | 56.48                    | 1                   |        |         |                       |

For experimental procedures see methods. text and Fig. 4. Note that peak areas and statistics are only provided, when at least one mutant/wildtype passed LOQ for the respective substance in the respective sample type and in case of kaempferol ratios. when kaempferol was detectable. For mutants, values are only determined when the respective wildtype is above LOQ (with one exception. see below). If these criteria are not given, the values are not determined (n.d.). For pelargonidin in extracted hydrolysed samples, only values for *tt7-1* and *Ler* are given as detection is due to release from the internal standard and the high levels of this substance were show in Figure 4d. \*Values for cyanidin in non-extracted hydrolysed samples for *tt7-1* are not determined as this was shown to be due to conversion from pelargonidin.

“Normalized response” = normalized to the respective internal standard or to kaempferol as indicated above the column. Fold differences are calculated relative to the respective wildtypes. For kaempferol ratios for each samples and substance the ratios were calculated. Means, STDEVs and RSDs for these ratios are given here.

“n.d.” = not determined. “Name”: The name of the wildtype or mutant is give. In brackets: the background of the respective mutant is given. “ta” = taxifolin. “ka” = kaempferol. “qu” = quercetin. “is” = isorhamnetin. “pe” = pelargonidin. “cy” = cyaniding. “de” = delphinidin. “c” = catechin. “e” = epicatechin. “pB” = procyanidin B2. For LOD/LOQ see methods.

|                             |                |                | compared to geno2 ( <i>P</i> -value) |               |              |              |               |                |                |               |          |          |          |          |
|-----------------------------|----------------|----------------|--------------------------------------|---------------|--------------|--------------|---------------|----------------|----------------|---------------|----------|----------|----------|----------|
| sample type                 | substance      | geno1          | <i>tt3-1</i>                         | <i>ttg1-1</i> | <i>tt8-3</i> | <i>tt2-1</i> | <i>pap1-D</i> | <i>mybRNAi</i> | <i>hy5-215</i> | <i>cop1-6</i> | Col-0    | Ler      | Ws-2     |          |
| extracted<br>non-hydrolysed | e              | <i>pap1-D</i>  |                                      |               |              |              |               | 6.31E-01       | 2.90E-01       | 8.06E-02      | 9.34E-01 |          |          |          |
|                             |                | <i>mybRNAi</i> |                                      |               |              |              |               |                | 2.31E-01       | 7.43E-02      | 7.36E-01 |          |          |          |
|                             |                | <i>hy5-215</i> |                                      |               |              |              |               |                |                | 9.92E-02      | 3.23E-01 |          |          |          |
|                             |                | <i>cop1-6</i>  |                                      |               |              |              |               |                |                |               | 7.95E-02 |          |          |          |
|                             |                | Col-0          |                                      |               |              |              |               |                |                |               |          | 1.04E-02 | 5.97E-03 |          |
|                             | Ler            |                |                                      |               |              |              |               |                |                |               |          | 1.54E-01 |          |          |
|                             | pB             | <i>pap1-D</i>  |                                      |               |              |              |               | 2.52E-01       | 1.54E-02       | 6.66E-02      | 2.87E-01 |          |          |          |
|                             |                | <i>mybRNAi</i> |                                      |               |              |              |               |                | 4.16E-02       | 8.71E-02      | 1.28E-01 |          |          |          |
|                             |                | <i>hy5-215</i> |                                      |               |              |              |               |                |                | 4.99E-02      | 8.57E-03 |          |          |          |
|                             |                | <i>cop1-6</i>  |                                      |               |              |              |               |                |                |               | 6.03E-02 |          |          |          |
| Col-0                       |                |                |                                      |               |              |              |               |                |                |               | 8.54E-03 | 3.08E-03 |          |          |
| Ler                         |                |                |                                      |               |              |              |               |                |                |               | 5.25E-03 |          |          |          |
| extracted<br>hydrolysed     | ka             | <i>tt7-1</i>   | 6.34E-03                             | 6.08E-03      | 6.26E-03     | 6.03E-03     | 5.32E-03      | 5.33E-03       | 6.27E-03       | 5.86E-03      | 5.42E-03 | 6.05E-03 | 6.08E-03 |          |
|                             |                | <i>tt3-1</i>   |                                      | 2.69E-01      | 4.66E-01     | 2.48E-01     | 8.34E-04      | 4.58E-07       | 7.01E-01       | 5.38E-01      |          |          | 1.26E-02 |          |
|                             |                | <i>ttg1-1</i>  |                                      |               | 4.70E-01     | 8.86E-01     | 5.89E-03      | 6.36E-03       | 4.33E-01       | 9.20E-01      |          |          | 7.49E-01 |          |
|                             |                | <i>tt8-3</i>   |                                      |               |              | 4.13E-01     | 7.37E-04      | 4.90E-05       | 8.66E-01       | 6.59E-01      |          |          | 4.45E-01 |          |
|                             |                | <i>tt2-1</i>   |                                      |               |              |              | 1.13E-02      | 1.18E-02       | 3.81E-01       | 9.87E-01      |          | 9.10E-01 |          |          |
|                             | qu             | <i>pap1-D</i>  |                                      |               |              |              |               | 9.20E-01       | 6.57E-04       | 1.22E-01      | 5.69E-01 |          |          |          |
|                             |                | <i>mybRNAi</i> |                                      |               |              |              |               |                | 4.28E-04       | 1.14E-01      | 2.60E-01 |          |          |          |
|                             |                | <i>hy5-215</i> |                                      |               |              |              |               |                |                | 6.24E-01      | 3.41E-04 |          |          |          |
|                             |                | <i>cop1-6</i>  |                                      |               |              |              |               |                |                |               | 1.60E-01 |          |          |          |
|                             |                | Col-0          |                                      |               |              |              |               |                |                |               |          | 2.53E-04 | 6.51E-03 |          |
|                             | Ler            |                |                                      |               |              |              |               |                |                |               |          | 7.37E-01 |          |          |
|                             | is             | <i>tt3-1</i>   |                                      | 1.50E-03      | 5.35E-01     | 1.94E-03     | 3.56E-06      | 1.16E-05       | 4.10E-07       | 6.75E-05      |          |          | 4.13E-01 |          |
|                             |                | <i>ttg1-1</i>  |                                      |               | 1.94E-03     | 3.72E-01     | 4.83E-01      | 7.82E-01       | 1.90E-02       | 1.33E-06      |          |          | 4.29E-03 |          |
|                             |                | <i>tt8-3</i>   |                                      |               |              | 4.81E-03     | 1.79E-03      | 3.31E-03       | 3.33E-04       | 1.10E-04      |          |          |          | 1.11E-01 |
|                             |                | <i>tt2-1</i>   |                                      |               |              |              | 7.56E-02      | 3.59E-01       | 2.44E-03       | 1.85E-06      |          |          | 1.16E-02 |          |
|                             |                | <i>pap1-D</i>  |                                      |               |              |              |               | 5.93E-02       | 1.88E-03       | 1.32E-05      | 5.70E-03 |          |          |          |
|                             | pe             | <i>mybRNAi</i> |                                      |               |              |              |               |                | 2.43E-04       | 1.61E-05      | 1.74E-02 |          |          |          |
|                             |                | <i>hy5-215</i> |                                      |               |              |              |               |                |                | 2.59E-06      | 4.47E-04 |          |          |          |
|                             |                | <i>cop1-6</i>  |                                      |               |              |              |               |                |                |               | 6.38E-06 |          |          |          |
|                             |                | Col-0          |                                      |               |              |              |               |                |                |               |          | 2.51E-01 | 1.32E-03 |          |
| Ler                         |                |                |                                      |               |              |              |               |                |                |               |          | 7.65E-03 |          |          |
| cy                          | <i>tt3-1</i>   |                | 1.52E-04                             | 4.71E-04      | 1.97E-04     | 3.43E-03     | 1.75E-04      | 4.30E-04       | 2.35E-02       |               |          | 1.50E-03 |          |          |
|                             | <i>ttg1-1</i>  |                |                                      | 1.33E-03      | 1.72E-03     | 5.25E-03     | 9.67E-04      | 6.43E-05       | 1.98E-03       |               |          | 1.88E-04 |          |          |
|                             | <i>tt8-3</i>   |                |                                      |               | 3.60E-01     | 6.55E-01     | 1.49E-01      | 1.42E-01       | 1.00E-01       |               |          |          | 9.53E-01 |          |
|                             | <i>tt2-1</i>   |                |                                      |               |              | 2.74E-01     | 5.72E-01      | 5.91E-01       | 3.54E-02       |               |          | 5.61E-02 |          |          |
|                             | <i>pap1-D</i>  |                |                                      |               |              |              | 1.56E-01      | 1.61E-01       | 2.63E-01       | 3.17E-01      |          |          |          |          |
| c                           | <i>mybRNAi</i> |                |                                      |               |              |              |               | 8.96E-01       | 2.14E-02       | 2.66E-01      |          |          |          |          |
|                             | <i>hy5-215</i> |                |                                      |               |              |              |               |                | 2.48E-02       | 1.76E-01      |          |          |          |          |
|                             | <i>cop1-6</i>  |                |                                      |               |              |              |               |                |                | 4.41E-02      |          |          |          |          |
|                             | Col-0          |                |                                      |               |              |              |               |                |                |               | 3.40E-02 | 4.97E-01 |          |          |
|                             | Ler            |                |                                      |               |              |              |               |                |                |               |          | 3.37E-01 |          |          |
| e                           | <i>tt7-1</i>   |                |                                      |               |              |              |               |                |                |               |          | 2.38E-03 |          |          |
|                             | <i>pap1-D</i>  |                |                                      |               |              |              | 2.44E-01      | 8.07E-04       | 1.31E-03       | 6.21E-03      |          |          |          |          |
|                             | <i>mybRNAi</i> |                |                                      |               |              |              |               | 4.78E-03       | 6.04E-04       | 5.65E-02      |          |          |          |          |
|                             | <i>hy5-215</i> |                |                                      |               |              |              |               |                | 3.43E-04       | 6.19E-02      |          |          |          |          |
|                             | <i>cop1-6</i>  |                |                                      |               |              |              |               |                |                | 3.13E-04      |          |          |          |          |
| ta                          | Col-0          |                |                                      |               |              |              |               |                |                |               | 5.88E-06 | 7.89E-05 |          |          |
|                             | Ler            |                |                                      |               |              |              |               |                |                |               |          | 1.28E-03 |          |          |
|                             | <i>pap1-D</i>  |                |                                      |               |              |              | 9.38E-01      | 4.22E-04       | 9.96E-03       | 1.07E-02      |          |          |          |          |
|                             | <i>mybRNAi</i> |                |                                      |               |              |              |               | 4.17E-02       | 8.57E-03       | 8.68E-03      |          |          |          |          |
|                             | <i>hy5-215</i> |                |                                      |               |              |              |               |                | 5.66E-03       | 3.13E-03      |          |          |          |          |
| ka                          | <i>cop1-6</i>  |                |                                      |               |              |              |               |                |                | 6.25E-02      |          |          |          |          |
|                             | Col-0          |                |                                      |               |              |              |               |                |                |               | 1.31E-02 | 1.41E-03 |          |          |
|                             | Ler            |                |                                      |               |              |              |               |                |                |               |          | 2.60E-02 |          |          |
|                             | <i>pap1-D</i>  |                |                                      |               |              |              | 7.55E-01      | 2.52E-01       | 1.50E-02       | 1.31E-01      |          |          |          |          |
|                             | <i>mybRNAi</i> |                |                                      |               |              |              |               | 1.90E-01       | 1.23E-02       | 1.57E-02      |          |          |          |          |
| ka                          | <i>hy5-215</i> |                |                                      |               |              |              |               |                | 8.87E-03       | 4.49E-04      |          |          |          |          |
|                             | <i>cop1-6</i>  |                |                                      |               |              |              |               |                |                | 5.64E-02      |          |          |          |          |
|                             | Col-0          |                |                                      |               |              |              |               |                |                |               | 5.51E-05 | 7.26E-03 |          |          |
|                             | Ler            |                |                                      |               |              |              |               |                |                |               |          | 4.95E-02 |          |          |
|                             | <i>pap1-D</i>  |                |                                      |               |              |              | 2.54E-02      | 6.95E-04       | 2.13E-01       | 1.11E-01      |          |          |          |          |
| ka                          | <i>mybRNAi</i> |                |                                      |               |              |              |               | 2.90E-02       | 2.47E-01       | 5.18E-03      |          |          |          |          |
|                             | <i>hy5-215</i> |                |                                      |               |              |              |               |                | 4.99E-03       | 3.63E-04      |          |          |          |          |
|                             | <i>cop1-6</i>  |                |                                      |               |              |              |               |                |                | 2.57E-02      |          |          |          |          |
|                             | Col-0          |                |                                      |               |              |              |               |                |                |               | 5.59E-01 | 1.18E-01 |          |          |
|                             | Ler            |                |                                      |               |              |              |               |                |                |               |          | 3.87E-01 |          |          |
|                             | <i>tt7-1</i>   | 1.11E-03       | 1.12E-03                             | 1.11E-03      | 1.07E-03     | 9.84E-04     | 1.02E-03      | 1.03E-03       | 1.07E-03       | 1.05E-03      | 1.11E-03 | 1.08E-03 |          |          |
|                             | <i>tt3-1</i>   |                | 9.40E-01                             | 6.32E-01      | 7.42E-01     | 1.06E-02     | 2.69E-02      | 7.68E-01       | 9.71E-01       |               |          | 9.72E-01 |          |          |
|                             | <i>ttg1-1</i>  |                |                                      | 6.42E-01      | 6.87E-01     | 4.20E-03     | 1.24E-02      | 7.98E-01       | 9.80E-01       |               |          | 9.08E-01 |          |          |
|                             | <i>tt8-3</i>   |                |                                      |               | 4.87E-01     | 3.18E-03     | 1.24E-02      | 9.72E-01       | 7.17E-01       |               |          |          | 2.13E-01 |          |
|                             | <i>tt2-1</i>   |                |                                      |               |              | 2.98E-02     | 5.82E-02      | 5.94E-01       | 7.39E-01       |               | 7.59E-01 |          |          |          |
| <i>pap1-D</i>               |                |                |                                      |               |              | 1.10E-01     | 6.41E-02      | 2.76E-02       | 9.70E-03       |               |          |          |          |          |
| <i>mybRNAi</i>              |                |                |                                      |               |              |              | 1.37E-01      | 6.20E-02       | 1.85E-01       |               |          |          |          |          |
| <i>hy5-215</i>              |                |                |                                      |               |              |              |               | 8.09E-01       | 2.54E-01       |               |          |          |          |          |
