# Supplementary material for: A fast and simple LC-MS-based characterization of the flavonoid biosynthesis pathway for few seed(ling)s
Source: PubMed Central journal article supplement (PMC5007998; doi:10.1186/s12870-016-0880-7), 2016-09-01
Supplement: 12870_2016_880_MOESM8_ESM.pdf [file 12870_2016_880_MOESM8_ESM.pdf]

# Additional\_file\_8

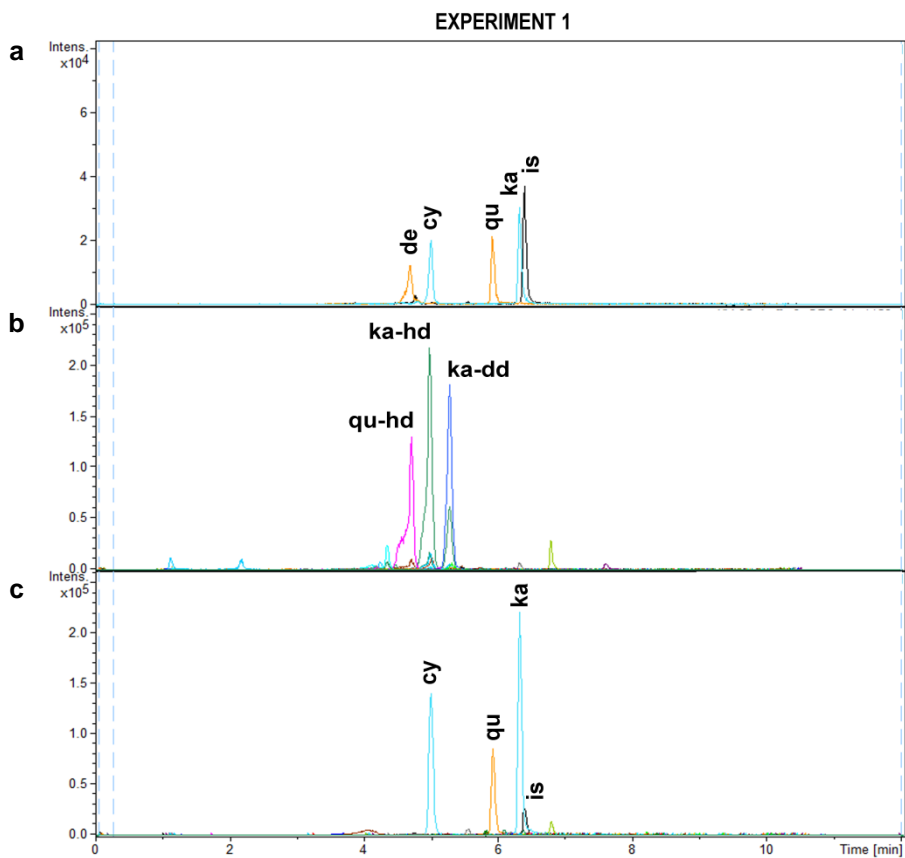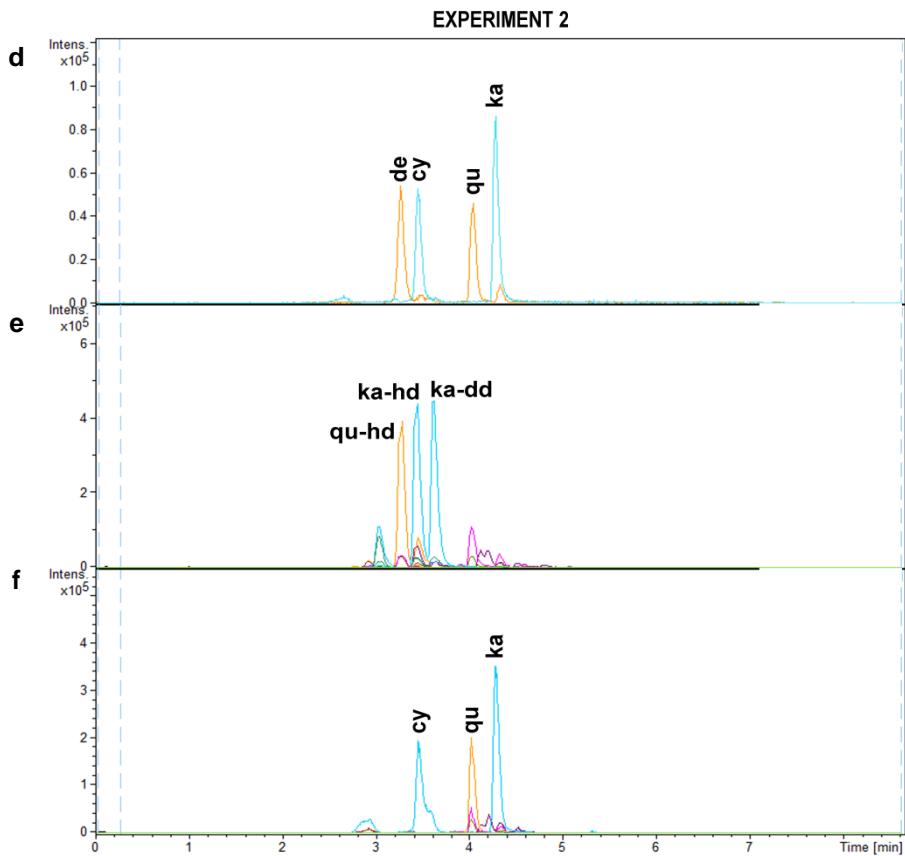

**Figure S11: Hydrolysis of main glycosylated flavonoids from seedling extracts.**

In two experiments (**a-c** and **d-f**), extracted non-hydrolysed samples from ten (b) and 15 (e) *A. thaliana* Col-0 seedlings with three replicates were subjected to hydrolytic conditions and analysed with the LC-ESI-MS-QTRAP(MRM) (a-c) and LC-ESI-MS-QTOF(pseudoMS<sup>3</sup>) setup (d-f). Note that we reduced the gradient in EXPERIMENT 2 even further. Shown are EICs for all *m/z* values documented in Table S3,6 covering all glycosylated flavonoids analyzed in Fig. 1c and all substances shown in Fig. 1b which theoretically can be present in plants. Reference EICs for the relevant flavonoids are given for each experiment (a,d).

EXPERIMENT 1: MeOH:HCl conc. (95:5) was replaced with MeOH:FA (99:1). Samples were either diluted without additional acid and treatment (b) or hydrolysed for 60 min at a final concentration of 5% HCl conc. (c). Samples shown in b and c originate from the same seedlings.

EXPERIMENT 2: MeOH:HCl conc. (95:5) was replaced with MeOH:FA (99:1). Heat was either applied (60min, sample f) or not applied (e).

Note that the kaempferol-based glycosylated flavonoid elutes close to cyanidin. Therefore care needs to be taken when analysing soluble samples with MRMs due to possible in-source fragmentation of glycosylated flavonoids. In this study only hydrolysed samples are analysed when using MRMs.

de: delphinidin, cy: cyanidin, qu: quercetin, ka: kaempferol, is: isorhamnetin, h: modified with an hexose, d: modified with a deoxy-hexose.

Table S14. Data for Figure 5

| Figure | Name  | Hydrolysis [min] | No. of seedlings | Dilution | Substance | LOD passed | LOQ passed | Normalized response | STDEV | RSD [%] | N | Compared to       | P-value | Linearity (r <sup>2</sup> ) |
|--------|-------|------------------|------------------|----------|-----------|------------|------------|---------------------|-------|---------|---|-------------------|---------|-----------------------------|
| 5a     | Col-0 | 30               | 10               | -        | na        | n.d.       | +          | 0.019               | 0.001 | 6.4     | 5 | 60 min hydrolysis | 0.147   | n.d.                        |
|        |       |                  |                  |          | ta        |            | +          | 0.012               | 0.002 | 20.0    |   |                   | 0.034   |                             |
|        |       |                  |                  |          | ka        |            | +          | 4.723               | 0.236 | 5.0     |   |                   | 0.002   |                             |
|        |       |                  |                  |          | qu        |            | +          | 1.445               | 0.167 | 11.6    |   |                   | 0.177   |                             |
|        |       |                  |                  |          | is        |            | +          | 0.622               | 0.082 | 13.2    |   |                   | 0.151   |                             |
|        |       |                  |                  |          | my        |            | -          | n.d.                | n.d.  | n.d.    |   |                   | n.d.    |                             |
|        |       |                  |                  |          | pe        |            | -          | n.d.                | n.d.  | n.d.    |   |                   | n.d.    |                             |
|        |       |                  |                  |          | cy        |            | +          | 0.813               | 0.169 | 20.8    |   |                   | 0.002   |                             |
|        |       |                  |                  |          | de        |            | -          | n.d.                | n.d.  | n.d.    |   |                   | n.d.    |                             |
|        |       |                  |                  |          | c         |            | -          | n.d.                | n.d.  | n.d.    |   |                   | n.d.    |                             |
| e      | -     | n.d.             | n.d.             | n.d.     | n.d.      |            |            |                     |       |         |   |                   |         |                             |
| pB     | -     | n.d.             | n.d.             | n.d.     | n.d.      |            |            |                     |       |         |   |                   |         |                             |
| 5a     | Col-0 | 60               | 10               | -        | na        | n.d.       | +          | 0.021               | 0.002 | 10.6    | 5 | 90 min hydrolysis | 0.159   | n.d.                        |
|        |       |                  |                  |          | ta        |            | +          | 0.015               | 0.001 | 8.1     |   |                   | 0.083   |                             |
|        |       |                  |                  |          | ka        |            | +          | 5.366               | 0.198 | 3.7     |   |                   | 0.070   |                             |
|        |       |                  |                  |          | qu        |            | +          | 1.660               | 0.271 | 16.3    |   |                   | 0.043   |                             |
|        |       |                  |                  |          | is        |            | +          | 0.701               | 0.075 | 10.7    |   |                   | 0.020   |                             |
|        |       |                  |                  |          | my        |            | -          | n.d.                | n.d.  | n.d.    |   |                   | n.d.    |                             |
|        |       |                  |                  |          | pe        |            | -          | n.d.                | n.d.  | n.d.    |   |                   | n.d.    |                             |
|        |       |                  |                  |          | cy        |            | +          | 1.373               | 0.211 | 15.4    |   |                   | 0.743   |                             |
|        |       |                  |                  |          | de        |            | -          | n.d.                | n.d.  | n.d.    |   |                   | n.d.    |                             |
|        |       |                  |                  |          | c         |            | -          | n.d.                | n.d.  | n.d.    |   |                   | n.d.    |                             |
| e      | -     | n.d.             | n.d.             | n.d.     | n.d.      |            |            |                     |       |         |   |                   |         |                             |
| pB     | -     | n.d.             | n.d.             | n.d.     | n.d.      |            |            |                     |       |         |   |                   |         |                             |
| 5a     | Col-0 | 90               | 10               | -        | na        | n.d.       | +          | 0.025               | 0.005 | 18.1    | 5 | 30 min hydrolysis | 0.049   | n.d.                        |
|        |       |                  |                  |          | ta        |            | +          | 0.018               | 0.003 | 15.9    |   |                   | 0.006   |                             |
|        |       |                  |                  |          | ka        |            | +          | 5.594               | 0.135 | 2.4     |   |                   | 0.0003  |                             |
|        |       |                  |                  |          | qu        |            | +          | 1.021               | 0.494 | 48.4    |   |                   | 0.130   |                             |
|        |       |                  |                  |          | is        |            | +          | 0.497               | 0.129 | 25.9    |   |                   | 0.110   |                             |
|        |       |                  |                  |          | my        |            | -          | n.d.                | n.d.  | n.d.    |   |                   | n.d.    |                             |
|        |       |                  |                  |          | pe        |            | -          | n.d.                | n.d.  | n.d.    |   |                   | n.d.    |                             |
|        |       |                  |                  |          | cy        |            | +          | 1.409               | 0.109 | 7.7     |   |                   | 0.0003  |                             |
|        |       |                  |                  |          | de        |            | -          | n.d.                | n.d.  | n.d.    |   |                   | n.d.    |                             |
|        |       |                  |                  |          | c         |            | -          | n.d.                | n.d.  | n.d.    |   |                   | n.d.    |                             |
| e      | -     | n.d.             | n.d.             | n.d.     | n.d.      |            |            |                     |       |         |   |                   |         |                             |

Table S14. Data for Figure 5

| Figure | Name  | Hydrolysis [min] | No. of seedlings | Dilution | Substance | LOD passed | LOQ passed | Normalized response | STDEV | RSD [%] | N | Compared to | P-value | Linearity (r <sup>2</sup> ) |    |
|--------|-------|------------------|------------------|----------|-----------|------------|------------|---------------------|-------|---------|---|-------------|---------|-----------------------------|----|
| 5a     | Col-0 | 90               | 10               | -        | pB        | n.d.       | -          | n.d.                | n.d.  | n.d.    | 5 | see above   | n.d.    | n.d.                        |    |
| 5b-d   | Col-0 | 60               | 20               | -        | na        | n.d.       | +          | 2.23                | 0.37  | 16.7    | 6 | 1/5/10*     | <0.01   | substance<br>r <sup>2</sup> |    |
|        |       |                  |                  |          | ta        |            | +          | 1.42                | 0.22  | 15.5    |   | 5/10/15*    | <0.01   |                             |    |
|        |       |                  |                  |          | ka        |            | +          | 268.18              | 23.25 | 8.7     |   | 1/5/10/15   | <0.01   |                             |    |
|        |       |                  |                  |          | qu        |            | +          | 96.51               | 28.39 | 29.4    |   | 1/5*        | <0.01   |                             |    |
|        |       |                  |                  |          | is        |            | +          | 40.73               | 6.15  | 15.1    |   | 1/5/10*     | <0.01   |                             |    |
|        |       |                  |                  |          | my        |            | -          | n.d.                | n.d.  | n.d.    |   | n.d.        | n.d.    |                             |    |
|        |       |                  |                  |          | pe        |            | -          | n.d.                | n.d.  | n.d.    |   | n.d.        | n.d.    |                             |    |
|        |       |                  |                  |          | cy        |            | +          | 99.90               | 16.01 | 16.0    |   | 1/5/10/15   | <0.05   |                             |    |
|        |       |                  |                  |          | de        |            | -          | n.d.                | n.d.  | n.d.    |   | n.d.        | n.d.    |                             |    |
|        |       |                  |                  |          | c         |            | -          | n.d.                | n.d.  | n.d.    |   | n.d.        | n.d.    |                             |    |
| 5b-d   | Col-0 | 60               | 15               | -        | na        | n.d.       | +          | 1.52                | 0.67  | 44.1    | 5 | 1*          | <0.05   | na                          |    |
|        |       |                  |                  |          | ta        |            | +          | 0.99                | 0.07  | 6.7     |   | 5/10*       | <0.01   | ta                          |    |
|        |       |                  |                  |          | ka        |            | +          | 213.06              | 12.08 | 5.7     |   | 1/5/10/20   | <0.01   |                             |    |
|        |       |                  |                  |          | qu        |            | +          | 86.02               | 24.54 | 28.5    |   | 1/5*        | <0.01   |                             |    |
|        |       |                  |                  |          | is        |            | +          | 33.33               | 5.44  | 16.3    |   | 1/5/10*     | <0.05   |                             |    |
|        |       |                  |                  |          | my        |            | -          | n.d.                | n.d.  | n.d.    |   | n.d.        | n.d.    |                             |    |
|        |       |                  |                  |          | pe        |            | -          | n.d.                | n.d.  | n.d.    |   | n.d.        | n.d.    |                             |    |
|        |       |                  |                  |          | cy        |            | +          | 75.58               | 3.97  | 5.2     |   | 1/5/10/20   | <0.05   |                             | ka |
|        |       |                  |                  |          | de        |            | -          | n.d.                | n.d.  | n.d.    |   | n.d.        | n.d.    |                             | qu |
|        |       |                  |                  |          | c         |            | -          | n.d.                | n.d.  | n.d.    |   | n.d.        | n.d.    |                             |    |
| 5b-d   | Col-0 | 60               | 10               | -        | na        | n.d.       | +          | 1.52                | 0.22  | 14.2    | 5 | 1/5/20*     | <0.05   |                             | is |
|        |       |                  |                  |          | ta        |            | +          | 0.67                | 0.06  | 8.5     |   | 1/5/15/20   | <0.001  |                             |    |
|        |       |                  |                  |          | ka        |            | +          | 159.33              | 12.46 | 7.8     |   | 1/5/15/20   | <0.001  |                             |    |
|        |       |                  |                  |          | qu        |            | +          | 73.00               | 5.70  | 7.8     |   | 1/5*        | <0.001  |                             |    |
|        |       |                  |                  |          | is        |            | +          | 25.45               | 2.20  | 8.7     |   | 1/5/15/20   | <0.05   |                             |    |
|        |       |                  |                  |          | my        |            | -          | n.d.                | n.d.  | n.d.    |   | n.d.        | n.d.    |                             |    |
|        |       |                  |                  |          | pe        |            | -          | n.d.                | n.d.  | n.d.    |   | n.d.        | n.d.    |                             |    |
|        |       |                  |                  |          | cy        |            | +          | 57.60               | 3.79  | 6.6     |   | 1/5/15/20   | <0.001  | cy                          |    |
|        |       |                  |                  |          | de        |            | -          | n.d.                | n.d.  | n.d.    |   | n.d.        | n.d.    |                             |    |
|        |       |                  |                  |          | c         |            | -          | n.d.                | n.d.  | n.d.    |   | n.d.        | n.d.    |                             |    |

Table S14. Data for Figure 5

| Figure | Name  | Hydrolysis [min] | No. of seedlings | Dilution | Substance | LOD passed | LOQ passed | Normalized response | STDEV | RSD [%] | N  | Compared to | P-value | Linearity (r <sup>2</sup> ) |                       |
|--------|-------|------------------|------------------|----------|-----------|------------|------------|---------------------|-------|---------|----|-------------|---------|-----------------------------|-----------------------|
| 5b-d   | Col-0 | 60               | 10               | -        | e         | n.d.       | -          | n.d.                | n.d.  | n.d.    | 5  | n.d.        | n.d.    |                             |                       |
|        |       |                  |                  |          | pB        |            | -          | n.d.                | n.d.  | n.d.    |    | n.d.        |         |                             |                       |
| 5b-d   | Col-0 | 60               | 5                | -        | na        | n.d.       | +          | 0.91                | 0.37  | 41.0    | 5  | 1/10/20*    | <0.05   | see above                   |                       |
|        |       |                  |                  |          | ta        |            | +          | 0.31                | 0.06  | 19.1    |    | 10/15/20*   | <0.001  |                             |                       |
|        |       |                  |                  |          | ka        |            | +          | 119.42              | 7.22  | 6.0     |    | 1/10/15/20  | <0.001  |                             |                       |
|        |       |                  |                  |          | qu        |            | +          | 28.31               | 5.39  | 19.0    |    | 1/10/15/20  | <0.01   |                             |                       |
|        |       |                  |                  |          | is        |            | +          | 13.25               | 1.63  | 12.3    |    | 1/10/15/20  | <0.001  |                             |                       |
|        |       |                  |                  |          | my        |            | -          | n.d.                | n.d.  | n.d.    |    | n.d.        | n.d.    |                             |                       |
|        |       |                  |                  |          | pe        |            | -          | n.d.                | n.d.  | n.d.    |    | n.d.        | n.d.    |                             |                       |
|        |       |                  |                  |          | cy        |            | +          | 28.47               | 4.61  | 16.2    |    | 1/10/15/20  | <0.001  |                             |                       |
|        |       |                  |                  |          | de        |            | -          | n.d.                | n.d.  | n.d.    |    | n.d.        | n.d.    |                             |                       |
|        |       |                  |                  |          | c         |            | -          | n.d.                | n.d.  | n.d.    |    | n.d.        | n.d.    |                             |                       |
| 5b-d   | Col-0 | 60               | 1                | -        | e         | n.d.       | -          | n.d.                | n.d.  | n.d.    | 5  | n.d.        | n.d.    |                             |                       |
|        |       |                  |                  |          | pB        |            | -          | n.d.                | n.d.  | n.d.    |    | n.d.        | n.d.    |                             |                       |
|        |       |                  |                  |          | na        |            | +          | 0.16                | 0.07  | 46.2    |    | 5/10/15/20  | <0.05   |                             |                       |
|        |       |                  |                  |          | ta        |            | -          | n.d.                | n.d.  | n.d.    |    | n.d.        | n.d.    |                             |                       |
|        |       |                  |                  |          | ka        |            | +          | 31.18               | 4.45  | 14.3    |    | 5/10/15/20  | <0.001  |                             |                       |
|        |       |                  |                  |          | qu        |            | +          | 4.27                | 0.87  | 20.2    |    | 5/10/15/20  | <0.01   |                             |                       |
|        |       |                  |                  |          | is        |            | +          | 1.81                | 0.29  | 15.8    |    | 5/10/15/20  | <0.001  |                             |                       |
|        |       |                  |                  |          | my        |            | -          | n.d.                | n.d.  | n.d.    |    | n.d.        | n.d.    |                             |                       |
|        |       |                  |                  |          | pe        |            | -          | n.d.                | n.d.  | n.d.    |    | n.d.        | n.d.    |                             |                       |
|        |       |                  |                  |          | cy        |            | +          | 7.26                | 1.37  | 18.9    |    | 5/10/15/20  | <0.001  |                             |                       |
| 5e     | Col-0 | 60               | 10               | -        | de        |            | -          | n.d.                | n.d.  | n.d.    | 10 | hy5-215     | 0.002   | n.d.                        |                       |
|        |       |                  |                  |          | c         |            | -          | n.d.                | n.d.  | n.d.    |    |             |         |                             | n.d.                  |
|        |       |                  |                  |          | e         |            | -          | n.d.                | n.d.  | n.d.    |    |             |         |                             | n.d.                  |
|        |       |                  |                  |          | pe        |            | +          | n.d.                | n.d.  | n.d.    |    |             |         |                             | n.d.                  |
|        |       |                  |                  |          | cy        |            | +          | 57.19               | 6.57  | 11.48   |    |             |         |                             | 2.3x10 <sup>-10</sup> |
|        |       |                  |                  |          | de        |            | -          | n.d.                | n.d.  | n.d.    |    |             |         |                             | n.d.                  |
|        |       |                  |                  |          | is        |            | +          | 25.03               | 2.04  | 8.16    |    |             |         |                             | 1.9x10 <sup>-06</sup> |
|        |       |                  |                  |          | qu        |            | +          | 72.05               | 7.15  | 9.92    |    |             |         |                             | 5.6x10 <sup>-11</sup> |
|        |       |                  |                  |          | ka        |            | +          | 167.02              | 12.11 | 7.25    |    |             |         |                             | 0.014                 |
|        |       |                  |                  |          | ta        |            | +          | 0.62                | 0.08  | 12.88   |    |             |         |                             | 0.144                 |

Table S14. Data for Figure 5

| Figure | Name                      | Hydrolysis [min] | No. of seedlings | Dilution | Substance | LOD passed | LOQ passed | Normalized response | STDEV | RSD [%] | N  | Compared to    | P-value               | Linearity (r <sup>2</sup> ) |
|--------|---------------------------|------------------|------------------|----------|-----------|------------|------------|---------------------|-------|---------|----|----------------|-----------------------|-----------------------------|
| 5e     | <i>hy5-215</i><br>(Col-0) | 60               | 10               | -        | c         | -          | -          | n.d.                | n.d.  | n.d.    | 10 | <i>hy5-215</i> | n.d.                  | n.d.                        |
|        |                           |                  |                  |          | e         | -          | -          | n.d.                | n.d.  | n.d.    |    |                | n.d.                  |                             |
|        |                           |                  |                  |          | pB        | -          | -          | n.d.                | n.d.  | n.d.    |    |                | n.d.                  |                             |
|        |                           |                  |                  |          | na        | +          | +          | 4.33                | 1.93  | 44.65   | 3  | <i>mybRNAi</i> | 0.0777                | n.d.                        |
|        |                           |                  |                  |          | ta        | +          | +          | 0.31                | 0.09  | 30.12   |    |                | 0.5347                |                             |
|        |                           |                  |                  |          | ka        | +          | +          | 58.29               | 3.53  | 6.05    |    |                | 0.0015                |                             |
|        |                           |                  |                  |          | qu        | +          | +          | 6.20                | 4.35  | 70.13   |    |                | 0.0005                |                             |
|        |                           |                  |                  |          | is        | +          | +          | 6.58                | 2.53  | 38.53   |    |                | 0.0026                |                             |
|        |                           |                  |                  |          | my        | -          | -          | n.d.                | n.d.  | n.d.    |    |                | n.d.                  |                             |
|        |                           |                  |                  |          | pe        | +          | -          | n.d.                | n.d.  | n.d.    |    |                | n.d.                  |                             |
|        |                           |                  |                  |          | cy        | +          | +          | 5.69                | 1.10  | 19.34   |    |                | 0.0437                |                             |
|        |                           |                  |                  |          | de        | -          | -          | n.d.                | n.d.  | n.d.    |    |                | n.d.                  |                             |
|        |                           |                  |                  |          | c         | -          | -          | n.d.                | n.d.  | n.d.    |    |                | n.d.                  |                             |
| e      | -                         | -                | n.d.             | n.d.     | n.d.      | n.d.       |            |                     |       |         |    |                |                       |                             |
| pB     | -                         | -                | n.d.             | n.d.     | n.d.      | n.d.       |            |                     |       |         |    |                |                       |                             |
| 5e     | <i>mybRNAi</i><br>(Col-0) | 60               | 10               | -        | na        | +          | +          | 0.57                | 0.07  | 12.10   | 3  | Col-0          | 2.6x10 <sup>-05</sup> | n.d.                        |
|        |                           |                  |                  |          | ta        | +          | +          | 0.27                | 0.03  | 9.70    |    |                | 1.9x10 <sup>-07</sup> |                             |
|        |                           |                  |                  |          | ka        | +          | +          | 170.11              | 10.95 | 6.44    |    |                | 0.70                  |                             |
|        |                           |                  |                  |          | qu        | +          | +          | 62.40               | 6.55  | 10.50   |    |                | 0.10                  |                             |
|        |                           |                  |                  |          | is        | +          | +          | 24.61               | 3.44  | 14.00   |    |                | 0.86                  |                             |
|        |                           |                  |                  |          | my        | -          | -          | n.d.                | n.d.  | n.d.    |    |                | n.d.                  |                             |
|        |                           |                  |                  |          | pe        | +          | -          | n.d.                | n.d.  | n.d.    |    |                | n.d.                  |                             |
|        |                           |                  |                  |          | cy        | +          | +          | 13.60               | 3.35  | 24.63   |    |                | 9.7x10 <sup>-07</sup> |                             |
|        |                           |                  |                  |          | de        | -          | -          | n.d.                | n.d.  | n.d.    |    |                | n.d.                  |                             |
|        |                           |                  |                  |          | c         | -          | -          | n.d.                | n.d.  | n.d.    |    |                | n.d.                  |                             |
| 5e     | <i>ttg1-1</i><br>(Ler)    | 60               | 10               | -        | na        | +          | +          | 0.64                | 0.35  | 55.35   | 3  | <i>tt3-1</i>   | 0.470                 | n.d.                        |
|        |                           |                  |                  |          | ta        | +          | +          | 0.56                | 0.07  | 12.04   |    |                | 0.046                 |                             |
|        |                           |                  |                  |          | ka        | +          | +          | 224.53              | 21.50 | 9.58    |    |                | 0.561                 |                             |
|        |                           |                  |                  |          | qu        | +          | +          | 104.95              | 11.95 | 11.39   |    |                | 0.058                 |                             |
|        |                           |                  |                  |          | is        | +          | +          | 2.16                | 0.09  | 4.38    |    |                | 0.016                 |                             |
|        |                           |                  |                  |          | my        | -          | -          | n.d.                | n.d.  | n.d.    |    |                | n.d.                  |                             |
|        |                           |                  |                  |          | pe        | +          | -          | n.d.                | n.d.  | n.d.    |    |                | n.d.                  |                             |
|        |                           |                  |                  |          | cy        | -          | -          | n.d.                | n.d.  | n.d.    |    |                | n.d.                  |                             |

**Table S14. Data for Figure 5**

| Figure | Name                     | Hydrolysis [min] | No. of seedlings | Dilution | Substance | LOD passed | LOQ passed | Normalized response | STDEV | RSD [%] | N | Compared to   | P-value | Linearity (r <sup>2</sup> ) |
|--------|--------------------------|------------------|------------------|----------|-----------|------------|------------|---------------------|-------|---------|---|---------------|---------|-----------------------------|
| 5e     | <i>ttg1-1</i><br>(Ler)   | 60               | 10               | -        | de        | -          | -          | n.d.                | n.d.  | n.d.    | 3 | <i>tt3-1</i>  | n.d.    | n.d.                        |
|        |                          |                  |                  |          | c         | -          | -          | n.d.                | n.d.  | n.d.    |   |               |         |                             |
|        |                          |                  |                  |          | e         | -          | -          | n.d.                | n.d.  | n.d.    |   |               |         |                             |
|        |                          |                  |                  |          | pB        | -          | -          | n.d.                | n.d.  | n.d.    |   |               |         |                             |
| 5e     | <i>tt3-1</i><br>(Ler)    | 60               | 10               | -        | na        | +          | +          | 0.83                | 0.16  | 19.27   | 3 | see above     | n.d.    |                             |
|        |                          |                  |                  |          | ta        | +          | +          | 25.66               | 9.65  | 37.59   |   |               |         |                             |
|        |                          |                  |                  |          | ka        | +          | +          | 243.89              | 46.33 | 19.00   |   |               |         |                             |
|        |                          |                  |                  |          | qu        | +          | +          | 177.16              | 35.10 | 19.82   |   |               |         |                             |
|        |                          |                  |                  |          | is        | +          | +          | 101.43              | 22.09 | 21.78   |   |               |         |                             |
|        |                          |                  |                  |          | my        | -          | -          | n.d.                | n.d.  | n.d.    |   |               |         |                             |
|        |                          |                  |                  |          | pe        | +          | -          | n.d.                | n.d.  | n.d.    |   |               |         |                             |
|        |                          |                  |                  |          | cy        | -          | -          | n.d.                | n.d.  | n.d.    |   |               |         |                             |
|        |                          |                  |                  |          | de        | -          | -          | n.d.                | n.d.  | n.d.    |   |               |         |                             |
|        |                          |                  |                  |          | c         | -          | -          | n.d.                | n.d.  | n.d.    |   |               |         |                             |
| e      | -                        | -                | n.d.             | n.d.     | n.d.      |            |            |                     |       |         |   |               |         |                             |
| pB     | -                        | -                | n.d.             | n.d.     | n.d.      |            |            |                     |       |         |   |               |         |                             |
| 5e     | <i>cop1-6</i><br>(Col-0) | 60               | 10               | 1:20     | na        | +          | +          | 2.64                | 0.19  | 7.3     | 3 | <i>pap1-D</i> | 0.0005  | n.d.                        |
|        |                          |                  |                  |          | ta        | +          | +          | 1.98                | 0.06  | 3.2     |   |               | 0.0030  |                             |
|        |                          |                  |                  |          | ka        | +          | +          | 793.97              | 44.22 | 5.6     |   |               | 0.0001  |                             |
|        |                          |                  |                  |          | qu        | +          | +          | 368.11              | 94.61 | 25.7    |   |               | 0.0176  |                             |
|        |                          |                  |                  |          | is        | +          | +          | 133.23              | 10.40 | 7.8     |   |               | 0.0005  |                             |
|        |                          |                  |                  |          | my        | -          | -          | n.d.                | n.d.  | n.d.    |   |               | n.d.    |                             |
|        |                          |                  |                  |          | pe        | +          | -          | n.d.                | n.d.  | n.d.    |   |               | n.d.    |                             |
|        |                          |                  |                  |          | cy        | +          | +          | 341.67              | 60.61 | 17.7    |   |               | 0.0820  |                             |
|        |                          |                  |                  |          | de        | +          | -          | n.d.                | n.d.  | n.d.    |   |               | n.d.    |                             |
|        |                          |                  |                  |          | c         | -          | -          | n.d.                | n.d.  | n.d.    |   |               | n.d.    |                             |
| e      | -                        | -                | n.d.             | n.d.     | n.d.      | n.d.       |            |                     |       |         |   |               |         |                             |
| pB     | -                        | -                | n.d.             | n.d.     | n.d.      | n.d.       |            |                     |       |         |   |               |         |                             |
| 5e     | <i>pap1-D</i><br>(Col-0) | 60               | 10               | 1:20     | na        | +          | -          | 1.06                | 0.19  | 18.0    | 3 | see above     | n.d.    |                             |
|        |                          |                  |                  |          | ta        | +          | -          | 0.76                | 0.17  | 22.7    |   |               |         |                             |
|        |                          |                  |                  |          | ka        | +          | +          | 264.99              | 34.95 | 13.2    |   |               |         |                             |
|        |                          |                  |                  |          | qu        | +          | +          | 41.10               | 34.01 | 82.7    |   |               |         |                             |
|        |                          |                  |                  |          | is        | +          | +          | 16.36               | 14.06 | 85.9    |   |               |         |                             |
|        |                          |                  |                  |          | my        | -          | -          | n.d.                | n.d.  | n.d.    |   |               |         |                             |
| pe     | +                        | -                | n.d.             | n.d.     | n.d.      |            |            |                     |       |         |   |               |         |                             |

**Table S14. Data for Figure 5**

| Figure                    | Name                     | Hydrolysis [min] | No. of seedlings | dilution | Substance | LOD passed            | LOQ passed | Normalized response | STDEV  | RSD [%] | N                          | Compared to                      | P-value | Linearity (r <sup>2</sup> )                |
|---------------------------|--------------------------|------------------|------------------|----------|-----------|-----------------------|------------|---------------------|--------|---------|----------------------------|----------------------------------|---------|--------------------------------------------|
| 5e                        | <i>pap1-D</i><br>(Col-0) | 60               | 10               | 1:20     | cy        | +                     | +          | 232.86              | 15.09  | 6.5     | 3                          | see above                        | n.d.    |                                            |
|                           |                          |                  |                  |          |           | de                    | -          | -                   | n.d.   | n.d.    |                            |                                  |         |                                            |
|                           |                          |                  |                  |          |           | c                     | -          | -                   | n.d.   | n.d.    |                            |                                  |         |                                            |
|                           |                          |                  |                  |          |           | e                     | -          | -                   | n.d.   | n.d.    |                            |                                  |         |                                            |
| 5b-d                      | Col-0                    | 60               | 20               | 1:13.5   | ka        | +                     | +          | 408.46              | 36.59  | n.d.    | 6                          | 5/10/15 <sup>#</sup>             | <0.05   | subst<br>ance<br>r <sup>2</sup><br>ka 0.97 |
|                           |                          |                  | 15               | 1:9      |           | +                     | +          | 349.94              | 21.82  | n.d.    | 5                          | 5/10/20 <sup>#</sup>             | <0.05   |                                            |
|                           |                          |                  | 10               | 1:6      |           | +                     | +          | 257.81              | 16.32  | 6.3     | 5                          | 5/15/20 <sup>#</sup>             | <0.001  |                                            |
|                           |                          |                  | 5                | 1:3      |           | +                     | +          | 145.44              | 11.55  | 7.9     | 5                          | 10/15/20 <sup>#</sup>            | <0.001  |                                            |
|                           |                          |                  | Col-0            | +        |           | +                     | 320.39     | 28.32               | 8.8    | 10      | <i>mybRNAi</i><br>vs Col-0 | 0.859                            |         |                                            |
| <i>mybRNAi</i><br>(Col-0) | +                        | +                | 324.09           | 29.47    | 9.1       | 3                     |            |                     |        |         |                            |                                  |         |                                            |
| 5e                        | <i>ttg1-1</i><br>(Ler)   | 60               | 10               | 1:6      | ka        | +                     | +          | 301.56              | 61.50  | 20.4    | 3                          | <i>ttg1-1</i> vs<br><i>tt3-1</i> | 0.418   | n.d.                                       |
|                           |                          |                  |                  |          |           | <i>tt3-1</i><br>(Ler) | +          | +                   | 339.96 | 37.37   | 11.0                       |                                  |         |                                            |

For experimental procedures see methods, text and Fig. 5. The data for each subfigure and the dilution originate from independent runs. Greyshade is used to separate runs and subfigures. For *mybRNAi* relative to Col-0 and *ttg1-1* relative to *tt3-1* the diluted sample was used for kaempferol in Figure 5e. Dilutions were done with MeOH. Note that peak areas and statistics are only determined when LOQ was passed.

“n.d.” = not determined. “Name”: The name of the wildtype or mutant is given. In brackets: the background of the respective mutant is given. “na” = naringenin, “ta” = taxifolin, “ka” = kaempferol, “qu” = quercetin, “is” = isorhamnetin, “my” = myricetin, “pe” = pelargonidin, “cy” = cyaniding, “de” = delphinidin, “c” = catechin, “e” = epicatechin, “pB” = procyanidin B2. For LOD/LOQ see methods. “Normalized response” = normalized to the internal standard D<sub>3</sub>-sakuranetin. “N”: number of replicates. “\*” = for all other seedling numbers: P>0.05. Please note, this excludes seedling numbers for which LOQ is not passed. “#”: the 1 seedling sample was not diluted. For all, significance was determined using the Welch test.
